# Supplementary material for: Copper-catalyzed aerobic conversion of the CO bond of ketones to a CN bond using ammonium salts as the nitrogen source
Source: Royal Society of Chemistry journal article supplement (doi:10.1039/c5cc02578h), 2015-01-01

## **Copper-catalyzed aerobic conversion of C=O bond of ketones to C≡N**

### **bond using ammonium salt as nitrogen source**

Bin Xu, Qing Jiang, An Zhao, Jing Jia, Qiang Liu, Weiping Luo and Cancheng Guo<sup>\*a</sup>

College of Chemistry and Chemical Engineering, Hunan University, Changsha 410082, P.R.  
China

## **Supporting Information**

### **Table of contents**

|                                                                      |     |
|----------------------------------------------------------------------|-----|
| 1. General information.....                                          | S1  |
| 2. Typical procedure for the synthesis of nitriles from ketones..... | S1  |
| 3. Optimization of reaction conditions.....                          | S1  |
| 4. The detection of benzaldimine and cleavage fragment by GC-MS..... | S2  |
| 5. Characterization data of products.....                            | S4  |
| 6. NMR Spectra of Products.....                                      | S10 |

## 1. General information

Unless otherwise noted, all reagents and solvents were obtained from commercial suppliers and used without further purification. All products were characterized by GC-MS,  $^1\text{H}$  NMR and  $^{13}\text{C}$  NMR. Mass spectra were measured on a mass instrument (EI).  $^1\text{H}$  NMR and  $^{13}\text{C}$  NMR spectra were recorded at 400 MHz and 101 MHz in  $\text{CDCl}_3$  or  $\text{DMSO}-d_6$  using TMS as internal standard. Multiplicities are indicated as s (singlet), d (doublet), t (triplet), q (quintet), and m (multiplet), and coupling constants ( $J$ ) are reported in hertz. The yield of benzonitrile and conversion of acetophenone were detected by gas phase chromatography, using a RTX-5 capillary column and a flame ionization detector (FID).

## 2. Typical procedure for the synthesis of nitriles from ketones

A Schlenk tube was charged with ketones **1** or **3** (1.0 mmol),  $\text{Cu}(\text{OAc})_2$  (54 mg, 0.3 mmol), TBAI (111 mg, 0.3 mmol),  $(\text{NH}_4)_2\text{CO}_3$  (157 mg, 1.0 mmol), and DMSO (3.0 mL), and the reaction mixture was stirred at  $120^\circ\text{C}$  under oxygen atmosphere for 5 h. After cooling to room temperature, the solution was then diluted with ethyl acetate ( $3 \times 10$  mL). The organic layers were combined, dried over  $\text{Na}_2\text{SO}_4$ , filtered and concentrated under vacuum and purified by column chromatography on silica gel (eluent: petroleum ether/ethyl acetate = 10/1) to obtain the desired product **2**.

## 3. Optimization of reaction conditions

Table S1. Screening of Reaction Conditions.<sup>a</sup>

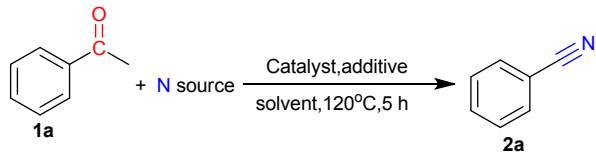

The reaction scheme shows acetophenone (1a) reacting with an N source in the presence of a catalyst and additive in a solvent at  $120^\circ\text{C}$  for 5 hours to produce benzonitrile (2a).

| Entry           | Catalyst                                           | N source                                       | Additive | Solvent     | Conv.(%) <sup>b</sup> | Yield(%) <sup>b</sup> |
|-----------------|----------------------------------------------------|------------------------------------------------|----------|-------------|-----------------------|-----------------------|
| 1               | CuI                                                | $(\text{NH}_4)_2\text{CO}_3$                   |          | DMSO        | 87                    | 47                    |
| 2               | CuBr                                               | $(\text{NH}_4)_2\text{CO}_3$                   |          | DMSO        | 83                    | 35                    |
| 3               | CuCl                                               | $(\text{NH}_4)_2\text{CO}_3$                   |          | DMSO        | 84                    | 38                    |
| 4               | $\text{CuBr}_2$                                    | $(\text{NH}_4)_2\text{CO}_3$                   |          | DMSO        | 80                    | 42                    |
| 5               | $\text{CuCl}_2$                                    | $(\text{NH}_4)_2\text{CO}_3$                   |          | DMSO        | 82                    | 39                    |
| 6               | $\text{Cu}(\text{acac})_2$                         | $(\text{NH}_4)_2\text{CO}_3$                   |          | DMSO        | 68                    | 25                    |
| 7               | CuO                                                | $(\text{NH}_4)_2\text{CO}_3$                   |          | DMSO        | 86                    | 27                    |
| 8               | $\text{Cu}_2\text{O}$                              | $(\text{NH}_4)_2\text{CO}_3$                   |          | DMSO        | 89                    | 43                    |
| 9               | $\text{Cu}(\text{OAc})_2 \cdot \text{H}_2\text{O}$ | $(\text{NH}_4)_2\text{CO}_3$                   |          | DMSO        | 96                    | 58                    |
| <b>10</b>       | <b><math>\text{Cu}(\text{OAc})_2</math></b>        | <b><math>(\text{NH}_4)_2\text{CO}_3</math></b> |          | <b>DMSO</b> | <b>&gt;99</b>         | <b>69</b>             |
| 11              | $\text{Cu}(\text{TFA})_2$                          | $(\text{NH}_4)_2\text{CO}_3$                   |          | DMSO        | >99                   | 52                    |
| 12 <sup>c</sup> | Other metals                                       | $(\text{NH}_4)_2\text{CO}_3$                   |          | DMSO        | <10                   | 0                     |
| 13              | $\text{Cu}(\text{OAc})_2$                          | $(\text{NH}_4)_2\text{CO}_3$                   |          | DMF         | >99                   | 60                    |
| 14              | $\text{Cu}(\text{OAc})_2$                          | $(\text{NH}_4)_2\text{CO}_3$                   |          | Toluene     | 82                    | 42                    |
| 15              | $\text{Cu}(\text{OAc})_2$                          | $(\text{NH}_4)_2\text{CO}_3$                   |          | DCE         | 65                    | 27                    |
| 16              | $\text{Cu}(\text{OAc})_2$                          | $(\text{NH}_4)_2\text{CO}_3$                   |          | NMP         | >99                   | 52                    |
| 17              | $\text{Cu}(\text{OAc})_2$                          | $(\text{NH}_4)_2\text{CO}_3$                   |          | DMA         | >99                   | 57                    |

|                 |                            |                                                   |             |             |               |           |
|-----------------|----------------------------|---------------------------------------------------|-------------|-------------|---------------|-----------|
| 18              | Cu(OAc) <sub>2</sub>       | NH <sub>4</sub> HCO <sub>3</sub>                  |             | DMSO        | >99           | 62        |
| 19              | Cu(OAc) <sub>2</sub>       | urea                                              |             | DMSO        | 96            | 10        |
| 20              | Cu(OAc) <sub>2</sub>       | NH <sub>4</sub> I                                 |             | DMSO        | 98            | 12        |
| 21              | Cu(OAc) <sub>2</sub>       | NH <sub>3</sub> ·H <sub>2</sub> O                 |             | DMSO        | >99           | 52        |
| 22              | Cu(OAc) <sub>2</sub>       | HCOONH <sub>4</sub>                               |             | DMSO        | 98            | 36        |
| 23              | Cu(OAc) <sub>2</sub>       | (NH <sub>4</sub> ) <sub>2</sub> CO <sub>3</sub>   | pyridine    | DMSO        | >99           | 70        |
| 24              | Cu(OAc) <sub>2</sub>       | (NH <sub>4</sub> ) <sub>2</sub> CO <sub>3</sub>   | TEMPO       | DMSO        | >99           | 71        |
| 25              | Cu(OAc) <sub>2</sub>       | (NH <sub>4</sub> ) <sub>2</sub> CO <sub>3</sub>   | HAcO        | DMSO        | >99           | 36        |
| <b>26</b>       | <b>Cu(OAc)<sub>2</sub></b> | <b>(NH<sub>4</sub>)<sub>2</sub>CO<sub>3</sub></b> | <b>TBAI</b> | <b>DMSO</b> | <b>&gt;99</b> | <b>80</b> |
| 27              | Cu(OAc) <sub>2</sub>       | (NH <sub>4</sub> ) <sub>2</sub> CO <sub>3</sub>   | TBAB        | DMSO        | >99           | 78        |
| 28              | Cu(OAc) <sub>2</sub>       | (NH <sub>4</sub> ) <sub>2</sub> CO <sub>3</sub>   | TBAF        | DMSO        | >99           | 75        |
| 29              | Cu(OAc) <sub>2</sub>       | (NH <sub>4</sub> ) <sub>2</sub> CO <sub>3</sub>   | TBAHS       | DMSO        | >99           | 36        |
| 30 <sup>d</sup> | Cu(OAc) <sub>2</sub>       | (NH <sub>4</sub> ) <sub>2</sub> CO <sub>3</sub>   | TBAI        | DMSO        | >99           | 68        |
| 31 <sup>e</sup> | Cu(OAc) <sub>2</sub>       | (NH <sub>4</sub> ) <sub>2</sub> CO <sub>3</sub>   | TBAI        | DMSO        | >99           | 75        |
| 32 <sup>f</sup> | Cu(OAc) <sub>2</sub>       | (NH <sub>4</sub> ) <sub>2</sub> CO <sub>3</sub>   | TBAI        | DMSO        | >99           | 77        |
| 33 <sup>g</sup> | Cu(OAc) <sub>2</sub>       | (NH <sub>4</sub> ) <sub>2</sub> CO <sub>3</sub>   | TBAI        | DMSO        | >99           | 71        |
| 34 <sup>h</sup> | Cu(OAc) <sub>2</sub>       | (NH <sub>4</sub> ) <sub>2</sub> CO <sub>3</sub>   | TBAI        | DMSO        | 50            | 40        |
| 35 <sup>i</sup> | Cu(OAc) <sub>2</sub>       | (NH <sub>4</sub> ) <sub>2</sub> CO <sub>3</sub>   | TBAI        | DMSO        | 0             | 0         |
| 36              | Cu(OAc) <sub>2</sub>       | —                                                 |             | DMSO        | 80            | 0         |
| 37              | —                          | (NH <sub>4</sub> ) <sub>2</sub> CO <sub>3</sub>   |             | DMSO        | 0             | 0         |

<sup>a</sup>Unless otherwise noted, the reaction conditions: **1a** (1.0 mmol), N source (1.0 equiv), catalyst (0.3mmol, 30mol%), additive (0.3mmol, 30mol%), solvent (3.0 mL), 120°C for 5 h. <sup>b</sup>Determined by GC analysis using bromobenzene as an internal standard. <sup>c</sup>Other metals: FeCl<sub>2</sub>, FeCl<sub>3</sub>, Ni(OAc)<sub>2</sub>, MnCl<sub>2</sub>·6H<sub>2</sub>O, and AgNO<sub>3</sub>, respectively. <sup>d</sup>(NH<sub>4</sub>)<sub>2</sub>CO<sub>3</sub> (0.6 equiv). <sup>e</sup>(NH<sub>4</sub>)<sub>2</sub>CO<sub>3</sub> (2.0 equiv). <sup>f</sup>110 °C, <sup>g</sup>130 °C. <sup>h</sup>Under air atmosphere. <sup>i</sup>Under nitrogen atmosphere.

#### 4. The detection of benzaldimine and cleavage fragment by GC-MS

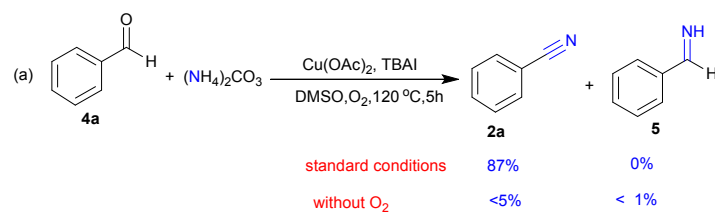

In order to verify if imines can be formed from aldehydes in the presence of ammonium salts, benzaldehyde was chosen to react with (NH<sub>4</sub>)<sub>2</sub>CO<sub>3</sub> under N<sub>2</sub> atmosphere. Not only trace (<5%) of benzonitrile was obtained, but also trace amount (<1%) of the corresponding benzaldimine (**5**) could be determined by GC-MS.

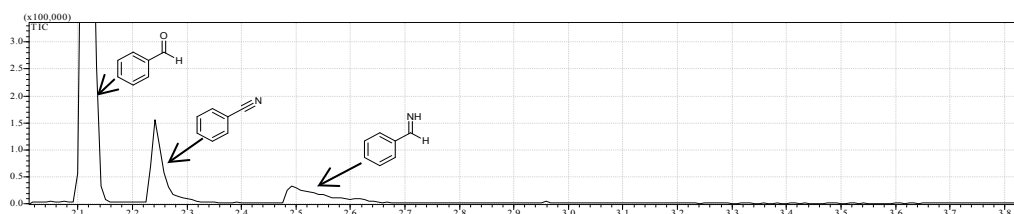

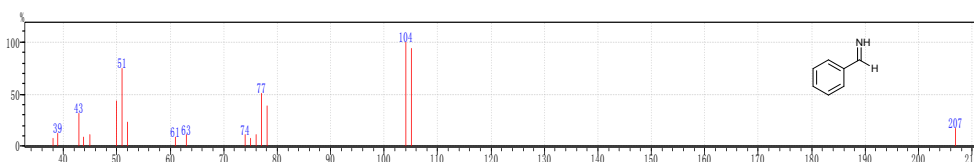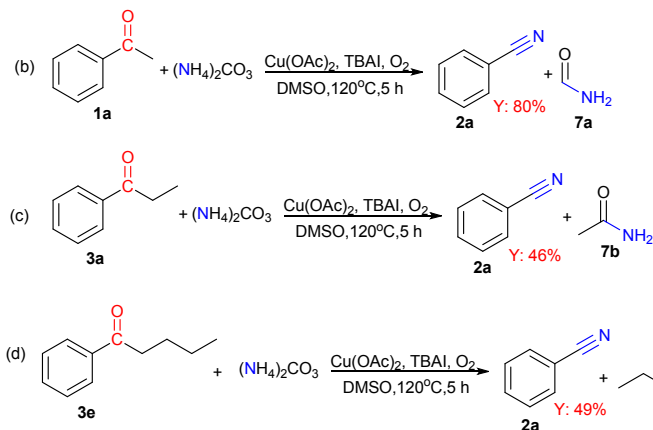

In order to identify the fragment of the ketones, substrate acetophenone (**1a**), propiophenone (**3a**) and valerophenone (**3e**) were tested under the standard conditions. As expected, apart from the generation of benzonitrile (**2a**), trace amount of formamide (**7a**), acetamide (**7b**) and *n*-butyramide (**7c**) could be detected by GC-MS, respectively.

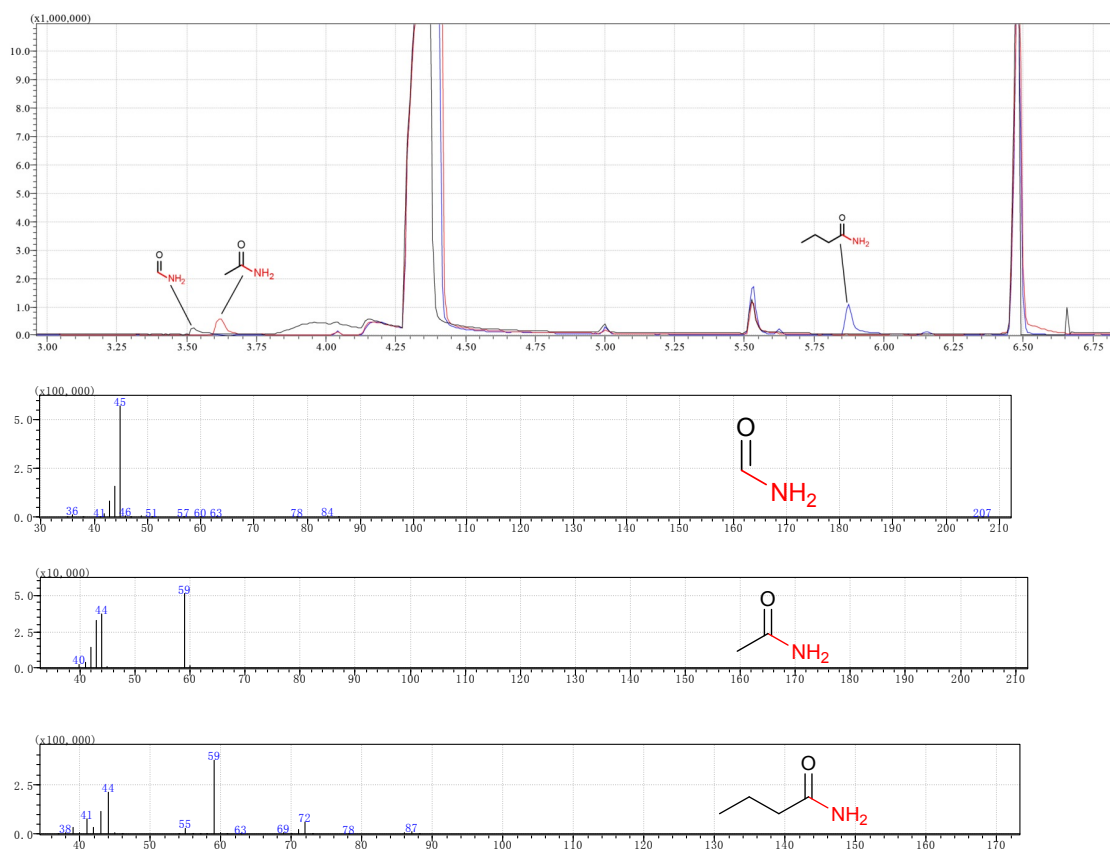

In order to explain why only trace amount of amide was detected for **1a**, **3a** and **3e**, *n*-butyramide was used as the substrate under the standard conditions to test the stability of the

aliphatic amides under the copper/O<sub>2</sub> catalyst system. The amount of the *n*-butyramide was quantified by GC using bromobenzene as the internal standard before and after the reaction (the spectrum of GC were shown as below). Before reaction, the *n*-butyramide was quantified as 87 mg (the ratio of the peak area of *n*-butyramide to bromobenzene was 236136/284648). After reaction, the *n*-butyramide was quantified as 32 mg (the ratio of the peak area of *n*-butyramide to bromobenzene was 128214/425740). Which revealed that the amount of *n*-butyramide was declined dramatically after reaction. These results implied the aliphatic amides may be unstable under the copper/O<sub>2</sub> catalyst system, so only trace amount of formamide, acetamide and *n*-butyramide could be detected by GC-MS, but 40% yield of benzamide could be isolated from 1,2-diphenylethanone (**3i**).

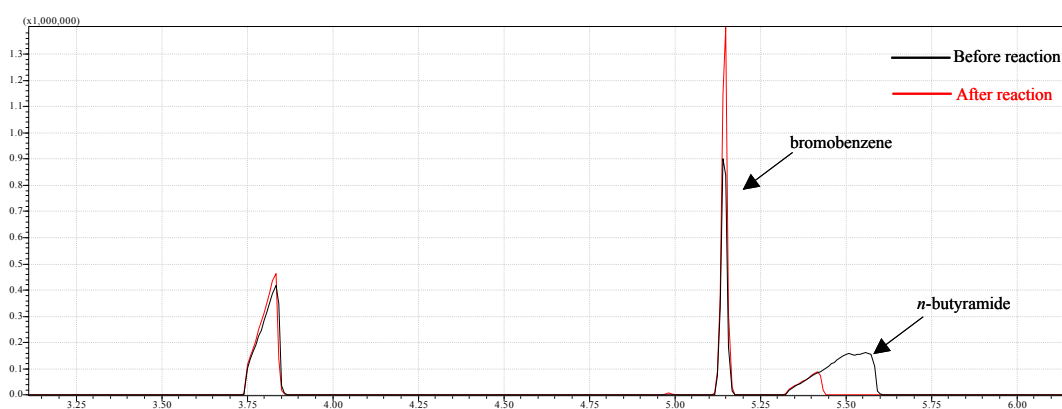

## 5. Characterization data of products

### (1) Benzonitrile (**2a**).

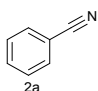

Following general procedure, **2a** was obtained from **1a**, **3a**, **3e**, **3i**, **4a**, **6**, **7** and **8** in 80% (82 mg), 46% (47 mg), 49% (50 mg), 62% (64 mg), 87% (90 mg), 92%(95 mg), 61%(63 mg) and 86% (89 mg) yield as colorless oil, respectively (the yield was detected by GC using bromobenzene as internal standard). <sup>1</sup>H NMR (CDCl<sub>3</sub>, 400 MHz): δ = 7.67–7.58 (m, 3H), 7.50–7.45 (m, 2H); <sup>13</sup>C NMR (CDCl<sub>3</sub>, 100 MHz): δ = 132.8, 132.1, 129.2, 118.9, 112.4; LRMS (EI 70 ev): *m/z* (%): 103 (M<sup>+</sup>, 100); Known compound.<sup>1</sup>

### (2) 4-Methoxybenzonitrile (**2b**).

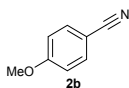

Following general procedure, **2b** was obtained from **1b**, **3b**, **3f** in 90% (119 mg), 48% (64 mg) and 59% (78 mg) yield as colorless solid, respectively. <sup>1</sup>H NMR (CDCl<sub>3</sub>, 400 MHz): δ = 7.59 (d, *J* = 8.8 Hz, 2H), 6.95 (d, *J* = 8.8 Hz, 2H), 3.86 (s, 3H); <sup>13</sup>C NMR (CDCl<sub>3</sub>, 100 MHz): δ = 162.9, 134.0, 119.3, 114.8, 104.0, 55.6; LRMS (EI 70 ev): *m/z* (%): 133 (M<sup>+</sup>, 100); Known compound.<sup>1</sup>

### (3) 4-Ethoxybenzonitrile (**2c**).

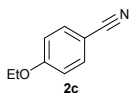

Following general procedure, **2c** was obtained from **1c** in 88% (129 mg) yield as colorless solid. <sup>1</sup>H NMR (CDCl<sub>3</sub>, 400 MHz): δ = 7.57 (d, *J* = 8.9 Hz, 2H), 6.93 (d, *J* = 8.9 Hz, 2H), 4.08 (q, *J* = 7.0 Hz, 2H), 1.44 (t, *J* = 7.0 Hz, 3H); <sup>13</sup>C NMR (CDCl<sub>3</sub>, 100 MHz): δ = 162.3, 134.0, 119.3, 115.2, 103.6, 64.0, 14.6; LRMS (EI 70 ev): *m/z* (%): 147 (M<sup>+</sup>, 100); Known compound.<sup>2</sup>

(4) **4-Tert-butylbenzonitrile (2d).**

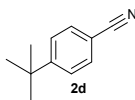

Following general procedure, **2d** was obtained from **1d** in 80% (127 mg) yield as colorless oil. <sup>1</sup>H NMR (CDCl<sub>3</sub>, 400 MHz): δ = 7.59 (d, *J* = 8.0 Hz, 2H), 7.48 (d, *J* = 8.0 Hz, 2H), 1.33 (s, 9H); <sup>13</sup>C NMR (CDCl<sub>3</sub>, 100 MHz): δ = 156.7, 132.0, 126.2, 119.2, 109.3, 35.3, 31.0; LRMS (EI 70 ev): *m/z* (%): 159 (M<sup>+</sup>, 100); Known compound.<sup>1</sup>

(5) **4-Methylbenzonitrile (2e).**

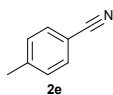

Following general procedure, **2e** was obtained from **1e** and **3c** in 86% (101 mg) and 45% (53 mg) yield as colorless oil, respectively. <sup>1</sup>H NMR (CDCl<sub>3</sub>, 400 MHz): δ = 7.54 (d, *J* = 8.0 Hz, 2H), 7.27 (d, *J* = 8.0 Hz, 2H), 2.42 (s, 3H); <sup>13</sup>C NMR (CDCl<sub>3</sub>, 100 MHz): δ = 142.7, 131.0, 128.8, 118.2, 108.3, 20.8; LRMS (EI 70 ev): *m/z* (%): 117 (M<sup>+</sup>, 100); Known compound.<sup>1</sup>

(6) **2-Methylbenzonitrile (2f).**

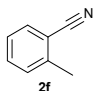

Following general procedure, **2f** was obtained from **1f** in 68% (79 mg) yield as colorless oil. <sup>1</sup>H NMR (CDCl<sub>3</sub>, 400 MHz): δ = 7.59 (d, *J* = 7.7 Hz, 1H), 7.48 (t, *J* = 7.6 Hz, 1H), 7.34 – 7.24 (m, 2H), 2.55 (s, 3H); <sup>13</sup>C NMR (CDCl<sub>3</sub>, 100 MHz): δ = 141.9, 132.7, 132.5, 130.2, 126.2, 118.2, 112.8, 20.5; LRMS (EI 70 ev): *m/z* (%): 117 (M<sup>+</sup>, 100); Known compound.<sup>3</sup>

(7) **3-Methylbenzonitrile (2g).**

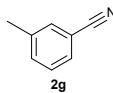

Following general procedure, **2g** was obtained from **1g** in 75% (84 mg) yield as colorless oil. <sup>1</sup>H NMR (CDCl<sub>3</sub>, 400 MHz): δ = 7.46 (s, 2H), 7.41 (d, *J* = 7.7 Hz, 1H), 7.38 – 7.32 (m, 1H), 2.39 (s, 3H); <sup>13</sup>C NMR (CDCl<sub>3</sub>, 100 MHz): δ = 139.2, 133.7, 132.5, 129.3, 129.0, 119.1, 112.2, 21.2; LRMS (EI 70 ev): *m/z* (%): 117 (M<sup>+</sup>, 100); Known compound.<sup>4</sup>

(8) **3,4-Dimethoxybenzonitrile (2h).**

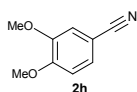

Following general procedure, **2h** was obtained from **1h** in 89% (145 mg) yield as white solid. <sup>1</sup>H NMR

(CDCl<sub>3</sub>, 400 MHz):  $\delta$  = 7.29 (dd,  $J$  = 8.4, 1.9 Hz, 1H), 7.08 (d,  $J$  = 1.8 Hz, 1H), 6.91 (d,  $J$  = 8.4 Hz, 1H), 3.94 (s, 3H), 3.91 (s, 3H); <sup>13</sup>C NMR (CDCl<sub>3</sub>, 100 MHz):  $\delta$  = 152.9, 149.2, 126.5, 119.2, 113.9, 111.2, 103.8, 56.1; LRMS (EI 70 ev):  $m/z$  (%): 163 (M<sup>+</sup>, 100); Known compound.<sup>2</sup>

(9) **2,4,6-Trimethylbenzonitrile (2i).**

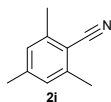

Following general procedure, **2i** was obtained from **1i** in 71% (103 mg) yield as white solid. <sup>1</sup>H NMR (CDCl<sub>3</sub>, 400 MHz):  $\delta$  = 6.93 (d,  $J$  = 0.4 Hz, 2H), 2.48 (s, 6H), 2.32 (s, 3H); <sup>13</sup>C NMR (CDCl<sub>3</sub>, 100 MHz):  $\delta$  = 142.8, 142.0, 128.2, 117.8, 110.6, 21.6, 20.6; LRMS (EI 70 ev):  $m/z$  (%): 145 (M<sup>+</sup>, 100); Known compound.<sup>1</sup>

(10) **4-Fluorobenzonitrile (2j).**

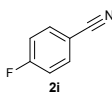

Following general procedure, **2j** was obtained from **1j** and **3g** in 65% (79 mg) and 49% (59 mg) yield as colorless solid, respectively. <sup>1</sup>H NMR (CDCl<sub>3</sub>, 400 MHz):  $\delta$  = 7.69 (dd,  $J$  = 8.7, 5.2 Hz, 2H), 7.19 (t,  $J$  = 8.5 Hz, 2H); <sup>13</sup>C NMR (CDCl<sub>3</sub>, 100 MHz):  $\delta$  = 165.0 (d,  $J$  = 256.5 Hz), 134.6 (d,  $J$  = 9.3 Hz), 118.0, 116.8 (d,  $J$  = 22.7 Hz), 108.5 (d,  $J$  = 3.7 Hz); LRMS (EI 70 ev):  $m/z$  (%): 121 (M<sup>+</sup>, 100); Known compound.<sup>5</sup>

(11) **4-Chlorobenzonitrile (2k).**

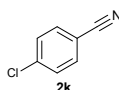

Following general procedure, **2k** was obtained from **1k** and **3c** in 85% (117 mg) and 49% (67 mg) yield as colorless solid, respectively. <sup>1</sup>H NMR (CDCl<sub>3</sub>, 400 MHz):  $\delta$  = 7.61 (d,  $J$  = 8.5 Hz, 2H), 7.47 (d,  $J$  = 8.5 Hz, 2H); <sup>13</sup>C NMR (CDCl<sub>3</sub>, 100 MHz):  $\delta$  = 139.5, 133.3, 129.6, 117.8, 110.7; LRMS (EI 70 ev):  $m/z$  (%): 137 (M<sup>+</sup>, 100); Known compound.<sup>1</sup>

(12) **4-Bromobenzonitrile (2l).**

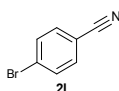

Following general procedure, **2l** was obtained from **1l** in 77% (141 mg) yield as yellow solid. <sup>1</sup>H NMR (CDCl<sub>3</sub>, 400 MHz):  $\delta$  = 7.64 (d,  $J$  = 8.5 Hz, 2H), 7.53 (d,  $J$  = 8.5 Hz, 2H); <sup>13</sup>C NMR (CDCl<sub>3</sub>, 100 MHz):  $\delta$  = 133.4, 132.7, 128.0, 118.1, 111.3; LRMS (EI 70 ev):  $m/z$  (%): 183 (M<sup>+</sup>, 100), 181 (95); Known compound.<sup>1</sup>

(13) **2-Bromobenzonitrile (2m).**

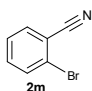

Following general procedure, **2m** was obtained from **1m** in 70% (127 mg) yield as colorless solid. <sup>1</sup>H NMR (CDCl<sub>3</sub>, 400 MHz):  $\delta$  = 7.69 (ddd,  $J$  = 10.9, 7.9, 1.8 Hz, 2H), 7.51 – 7.39 (m, 2H); <sup>13</sup>C NMR (CDCl<sub>3</sub>, 100 MHz):  $\delta$  = 134.3, 133.9, 133.2, 127.6, 125.4, 117.2, 115.9; LRMS (EI 70 ev):  $m/z$  (%): 183 (M<sup>+</sup>, 100), 181 (95); Known compound.<sup>1</sup>

(14) **3-Bromobenzonitrile (2n).**

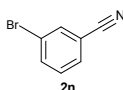

Following general procedure, **2n** was obtained from **1n** in 72% (130 mg) yield as colorless solid.  $^1\text{H}$  NMR ( $\text{CDCl}_3$ , 400 MHz):  $\delta = 7.81$  (s, 1H), 7.75 (d,  $J = 8.1$  Hz, 1H), 7.61 (d,  $J = 7.7$  Hz, 1H), 7.37 (t,  $J = 8.0$  Hz, 1H);  $^{13}\text{C}$  NMR ( $\text{CDCl}_3$ , 100 MHz):  $\delta = 136.1, 134.7, 130.7, 130.6, 122.9, 117.3, 114.2$ . LRMS (EI 70 ev):  $m/z$  (%): 183 ( $\text{M}^+$ , 100), 181 (95); Known compound.<sup>1</sup>

(15) **4-iodobenzonitrile (2o).**

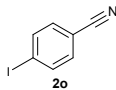

Following general procedure, **2o** was obtained from **1o** in 82% (188 mg) yield as white solid.  $^1\text{H}$  NMR ( $\text{CDCl}_3$ , 400 MHz):  $\delta = 7.77$  (d,  $J = 8.4$  Hz, 2H), 7.29 (d,  $J = 8.4$  Hz, 2H);  $^{13}\text{C}$  NMR ( $\text{CDCl}_3$ , 100 MHz):  $\delta = 138.5, 133.2, 118.3, 111.8, 100.4$ ; LRMS (EI 70 ev):  $m/z$  (%): 229 ( $\text{M}^+$ , 100); Known compound.<sup>1</sup>

(16) **4-Nitrobenzonitrile (2p).**

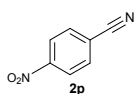

Following general procedure, **2p** was obtained from **1p** in 75% (111 mg) yield as colorless solid.  $^1\text{H}$  NMR ( $\text{CDCl}_3$ , 400 MHz):  $\delta = 8.37$  (d,  $J = 8.3$  Hz, 2H), 7.91 (d,  $J = 8.3$  Hz, 2H);  $^{13}\text{C}$  NMR ( $\text{CDCl}_3$ , 100 MHz):  $\delta = 150.1, 133.5, 124.3, 118.4, 116.8$ ; LRMS (EI 70 ev):  $m/z$  (%): 148 ( $\text{M}^+$ , 100); Known compound.<sup>1</sup>

(17) **1,4-Benzenedicarbonitrile (2q).**

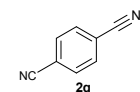

Following general procedure, **2q** was obtained from **1q** in 49% (63 mg) yield as white solid;  $^1\text{H}$  NMR ( $\text{DMSO-d}_6$ , 400 MHz):  $\delta = 8.10$  (s, 4H);  $^{13}\text{C}$  NMR ( $\text{DMSO-d}_6$ , 100 MHz):  $\delta = 133.7, 118.0, 116.2$ ; LRMS (EI 70 ev):  $m/z$  (%): 128 ( $\text{M}^+$ , 100); Known compound.<sup>6</sup>

(18) **2-Naphthonitrile (2r).**

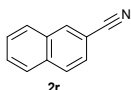

Following general procedure, **2r** was obtained from **1r** in 63% (96 mg) yield as yellow solid.  $^1\text{H}$  NMR ( $\text{CDCl}_3$ , 400 MHz):  $\delta = 8.23$  (s, 1H), 7.90 (t,  $J = 8.4$  Hz, 3H), 7.69 – 7.56 (m, 3H);  $^{13}\text{C}$  NMR ( $\text{CDCl}_3$ , 100 MHz):  $\delta = 134.6, 134.2, 132.2, 129.2, 129.0, 128.4, 128.1, 127.7, 126.3, 119.3, 109.4$ ; LRMS (EI 70 ev):  $m/z$  (%): 153 ( $\text{M}^+$ , 100); Known compound.<sup>1</sup>

(19) **Thiophene-2-carbonitrile (2s).**

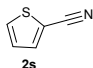

Following general procedure, **2s** was obtained from **1s** in 59% (64 mg) yield as colorless oil.  $^1\text{H}$  NMR ( $\text{CDCl}_3$ , 400 MHz):  $\delta = 7.67 - 7.60$  (m, 2H), 7.15 (dd,  $J = 5.0, 3.9$  Hz, 1H);  $^{13}\text{C}$  NMR ( $\text{CDCl}_3$ , 100 MHz):  $\delta = 137.5, 132.7, 127.7, 114.3, 109.9$ ; LRMS (EI 70 ev):  $m/z$  (%): 10 ( $\text{M}^+$ , 100); Known compound.<sup>7</sup>

(20) **3-Phenyl-acrylonitrile (2t).**

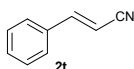

Following general procedure, **2t** was obtained from **3h** in 35% (46 mg) yield as colorless oil.  $^1\text{H}$  NMR ( $\text{CDCl}_3$ , 400 MHz):  $\delta = 7.48 - 7.33$  (m, 6H), 5.87 (d,  $J = 16.7$  Hz, 1H);  $^{13}\text{C}$  NMR ( $\text{CDCl}_3$ , 100 MHz):  $\delta =$



150.6, 133.5, 131.3, 129.2, 127.4, 118.2, 96.4 ; LRMS (EI 70 ev):  $m/z$  (%): 129 ( $M^+$ , 100); Known compound.<sup>3</sup>

(21) **Benzamide (3d).**

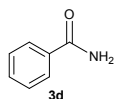

Following general procedure, **3d** was obtained from **3i** and **4b** in 40% (48 mg) and 48% (58 mg) yield as white solid, respectively. <sup>1</sup>H NMR (CDCl<sub>3</sub>, 400 MHz):  $\delta$  = 7.82 (d,  $J$  = 8.6 Hz, 2H), 7.53 (t,  $J$  = 7.4 Hz, 1H), 7.45 (t,  $J$  = 7.5 Hz, 2H), 6.21 (s, 2H); <sup>13</sup>C NMR (CDCl<sub>3</sub>, 100 MHz):  $\delta$  = 169.7, 133.2, 132.0, 128.7, 127.4; LRMS (EI 70 ev):  $m/z$  (%): 121 ( $M^+$ , 100); Known compound.<sup>8</sup>

(22) **3,5-diphenyl-1,2,4-oxadiazole (10).**

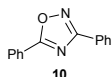

Following general procedure, **10** was obtained from **9** in 42% (47 mg) yield as white solid. <sup>1</sup>H NMR (400 MHz, CDCl<sub>3</sub>):  $\delta$  = 8.23 (d,  $J$  = 7.3 Hz, 2H), 8.18 (dd,  $J$  = 6.6, 2.7 Hz, 2H), 7.60 (d,  $J$  = 7.2 Hz, 1H), 7.58 – 7.50 (m, 5H); <sup>13</sup>C NMR (101 MHz, CDCl<sub>3</sub>):  $\delta$  = 175.7, 169.0, 132.8, 131.2, 129.1, 128.9, 128.2, 127.6, 127.0, 124.3; LRMS (EI 70 ev):  $m/z$  (%): 222 ( $M^+$ , 100); Known compound.<sup>9</sup>

## Reference

1. J. H. Xu, Q. Jiang and C. C. Guo, *The Journal of organic chemistry*, 2013, **78**, 11881-11886.
2. W. Zhou, L. Zhang and N. Jiao, *Angew Chem Int Ed Engl*, 2009, **48**, 7094-7097.
3. J. Kim and S. S. Stahl, *ACS catalysis*, 2013, **3**, 1652-1656.
4. L. Zhang, P. Lu and Y. Wang, *Chemical Communications*, 2015, **51**, 2840-2843.
5. L. Gu and C. Jin, *Chemical Communications*, 2015.
6. D. Azarifar and Z. Najminejad, *Journal of the Iranian Chemical Society*, 2014, **12**, 107-111.
7. T. Shen, T. Wang, C. Qin and N. Jiao, *Angew Chem Int Ed Engl*, 2013, **52**, 6677-6680.
8. C. Tang and N. Jiao, *Angew Chem Int Ed Engl*, 2014, **53**, 6528-6532.
9. A. Yoshimura, K. R. Middleton, A. D. Todora, B. J. Kastern, S. R. Koski, A. V. Maskaev and V. V. Zhdankin, *Organic letters*, 2013, **15**, 4010-4013.

## 6. NMR Spectra of Products

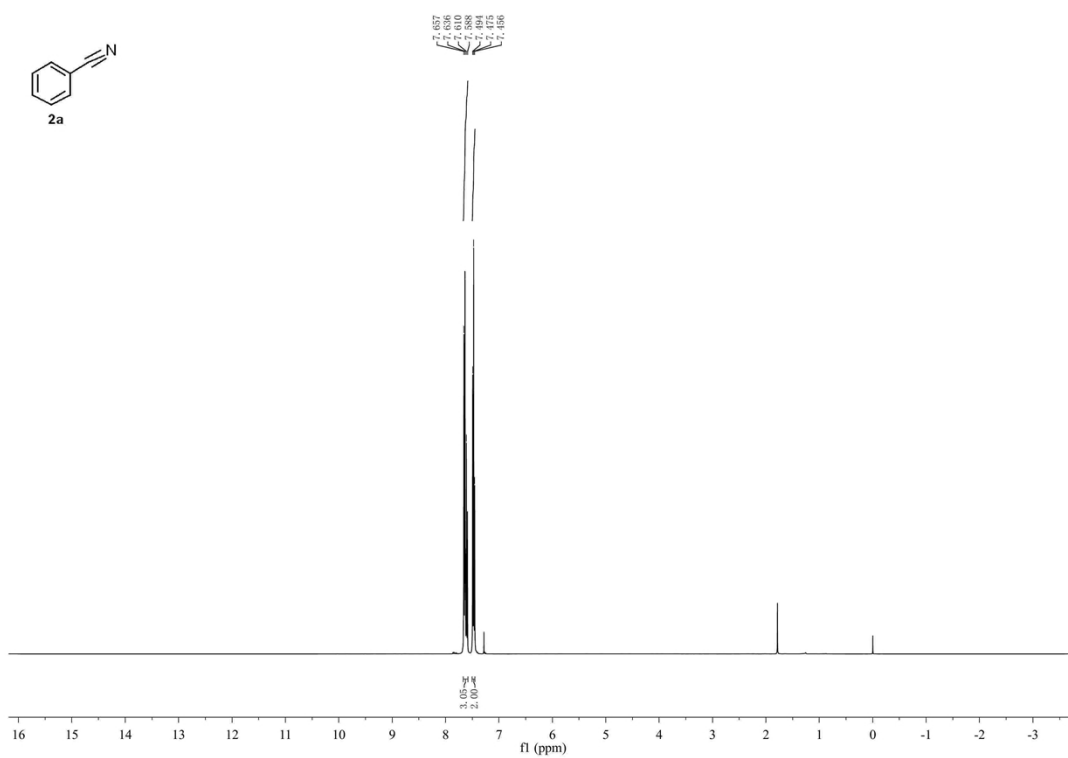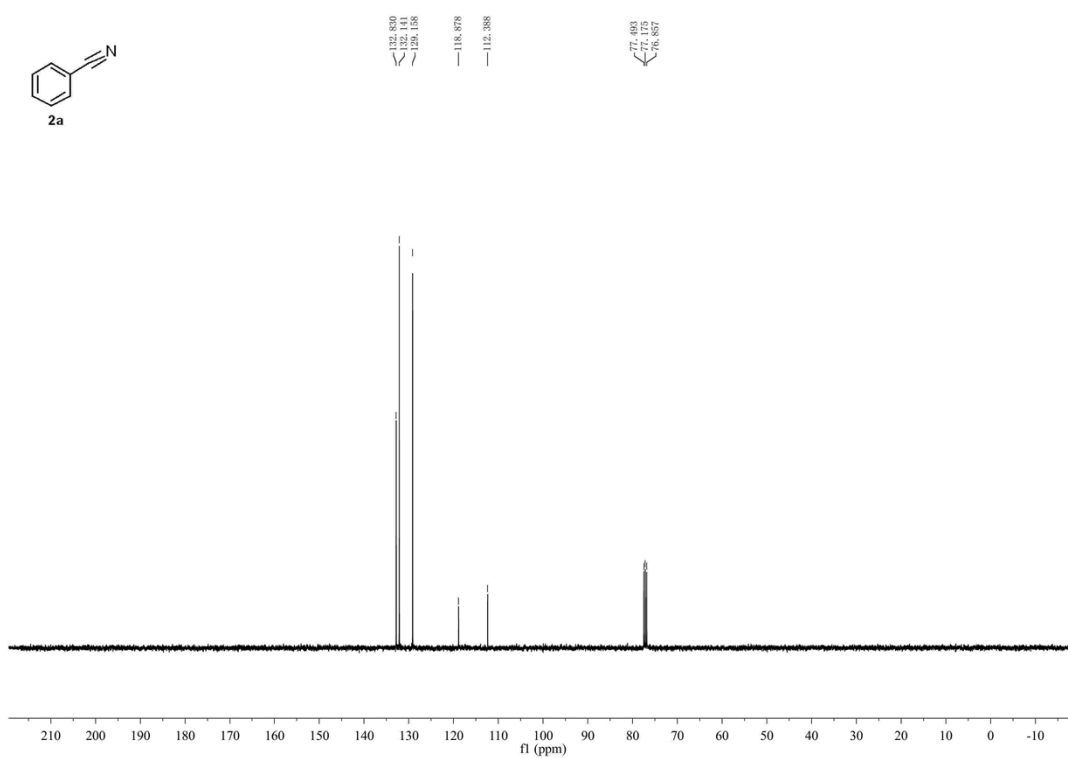

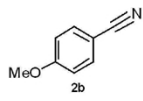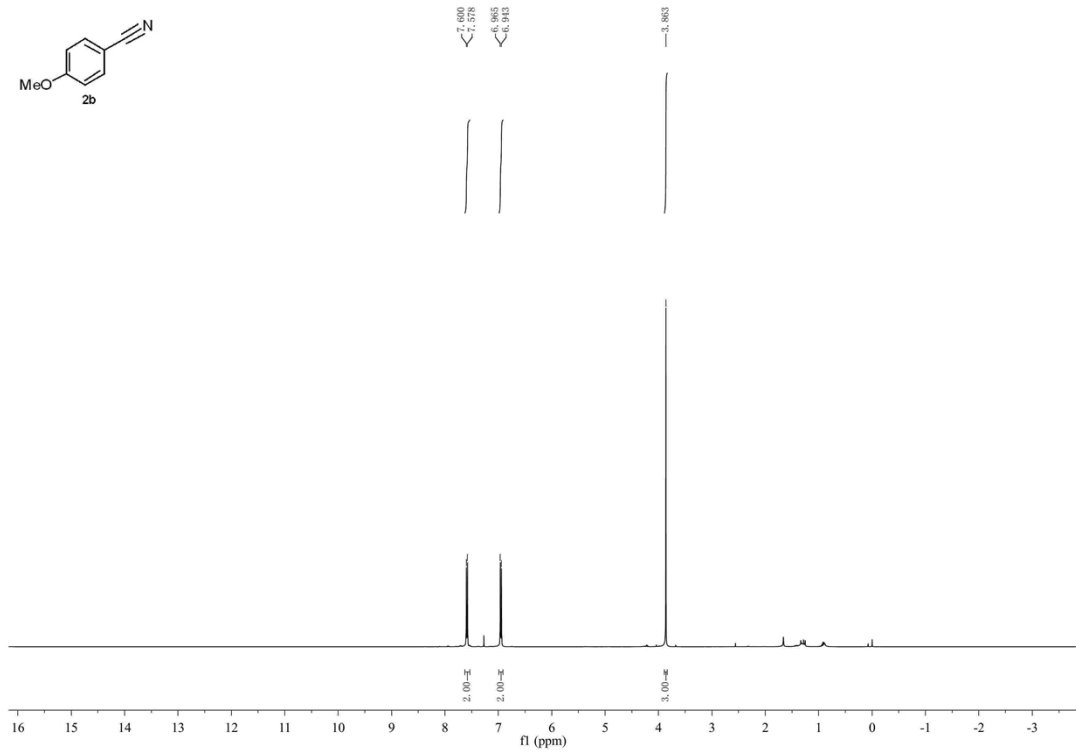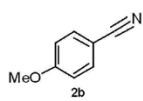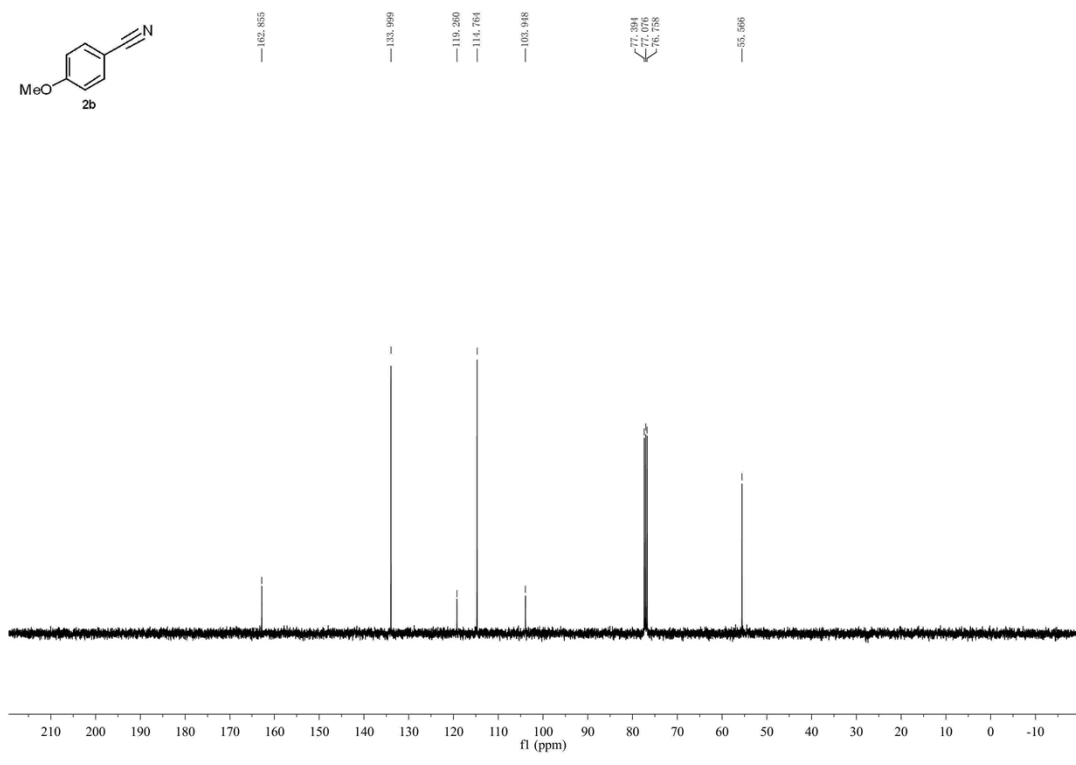

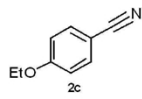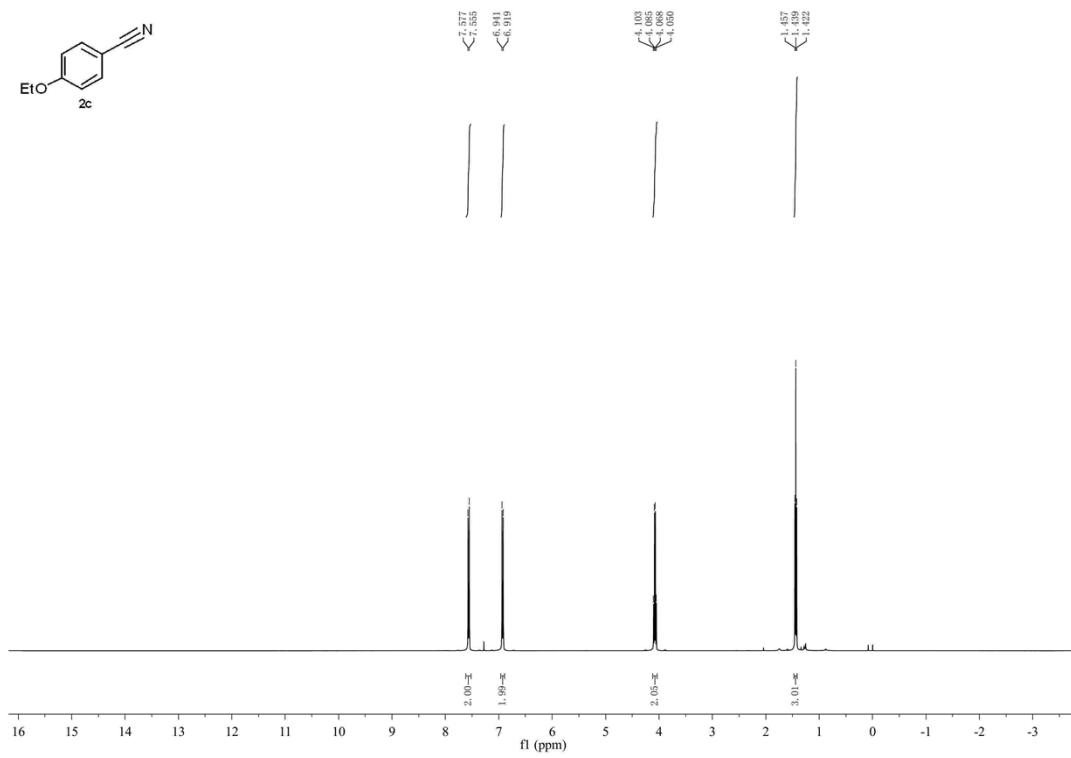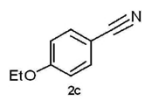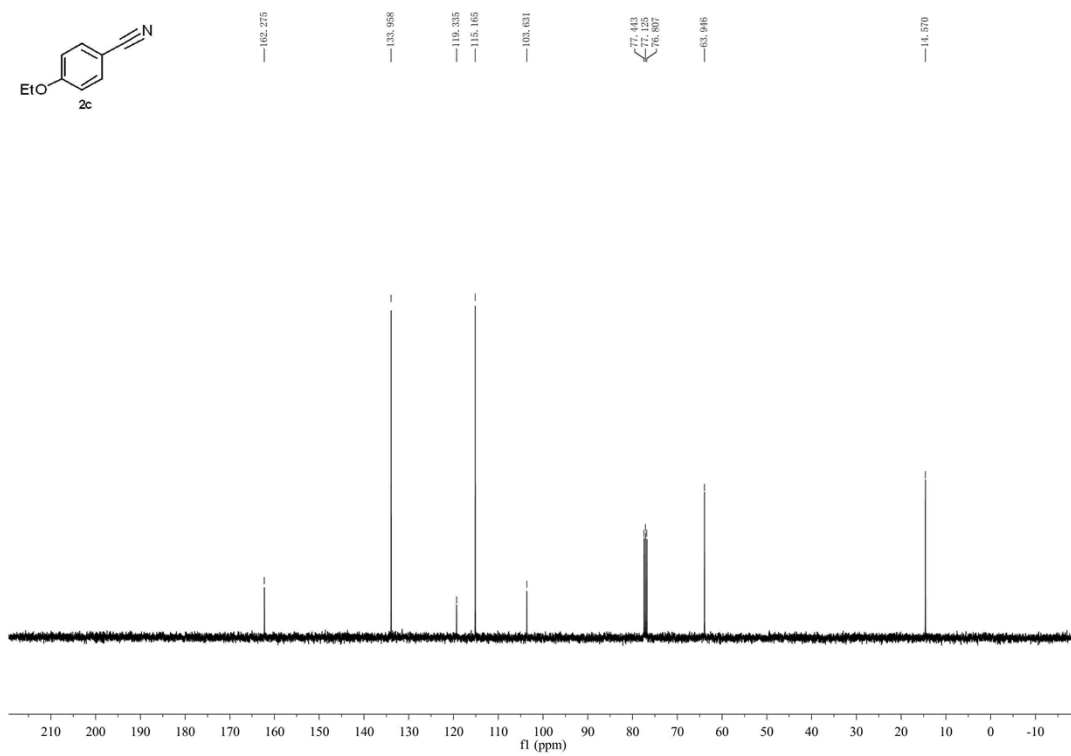

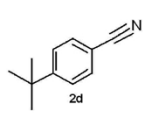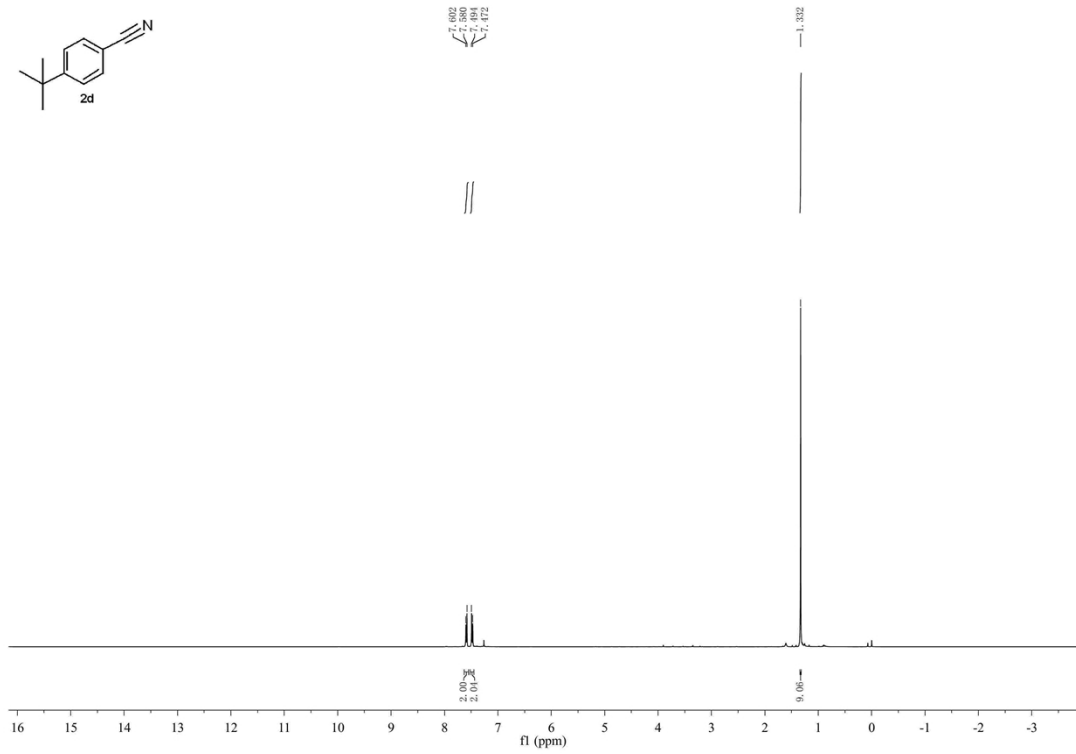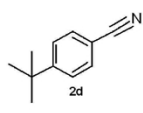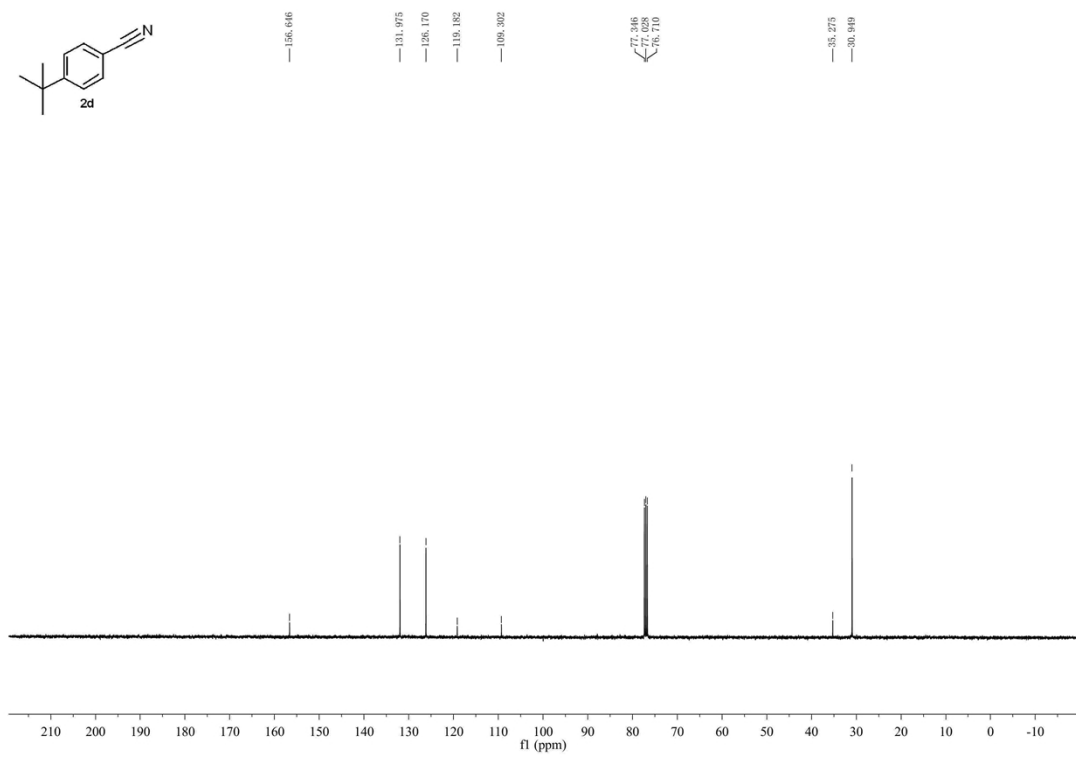

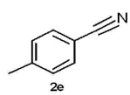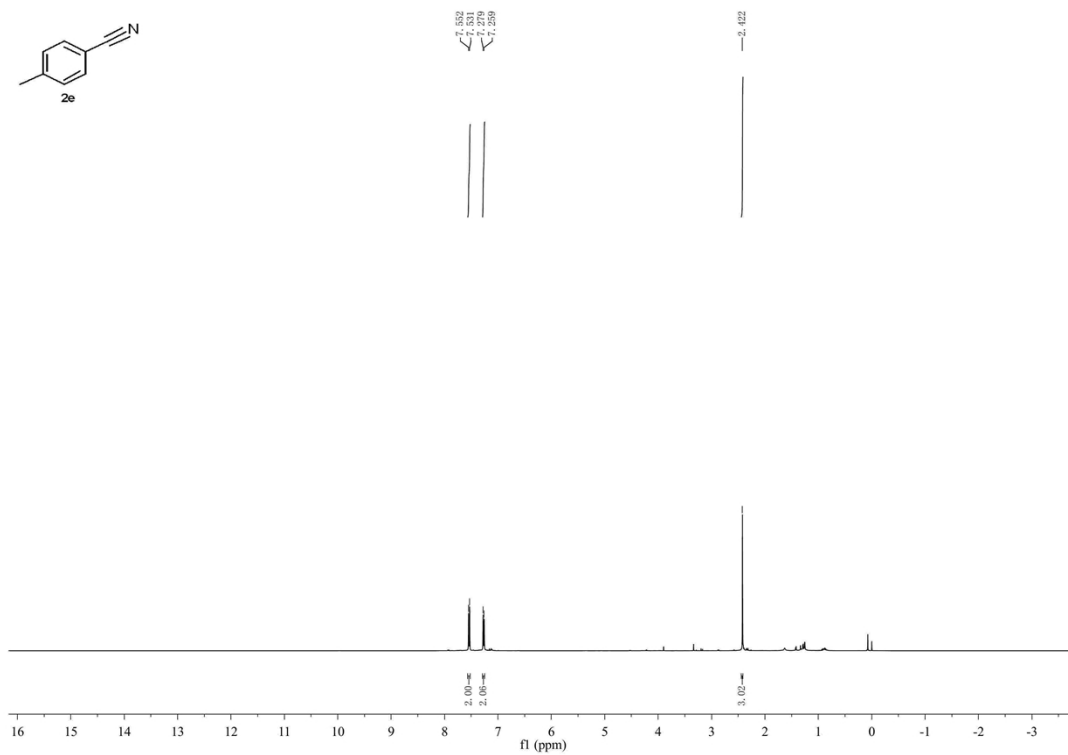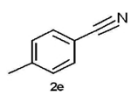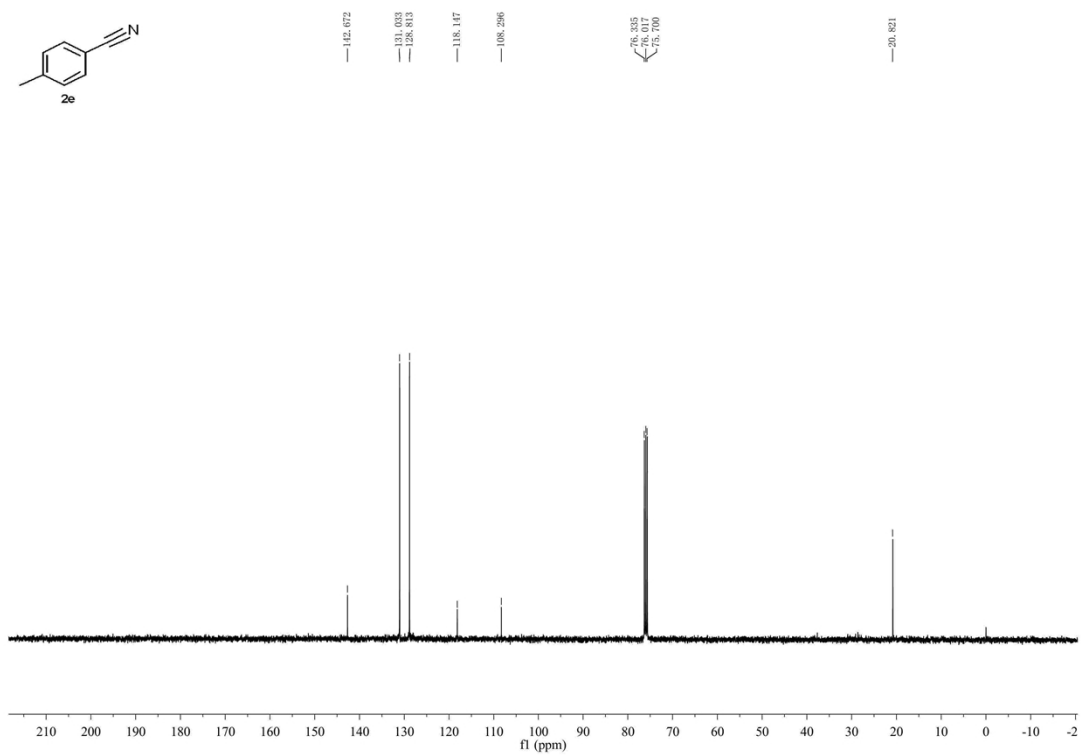

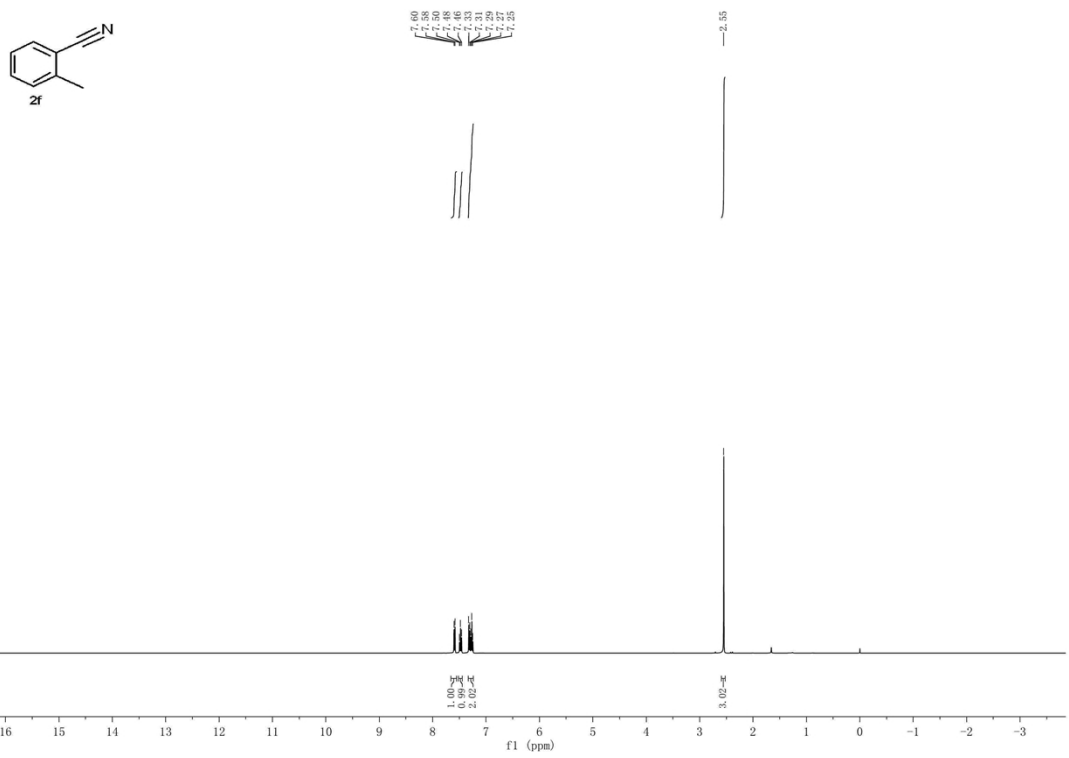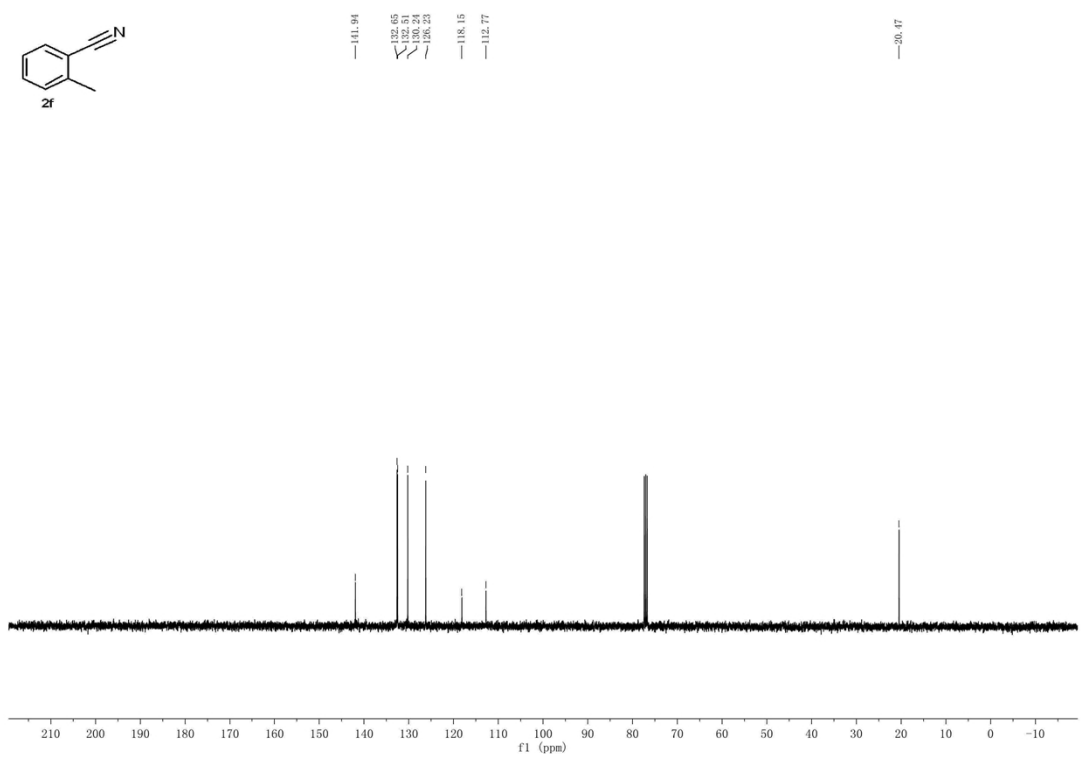



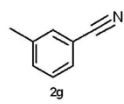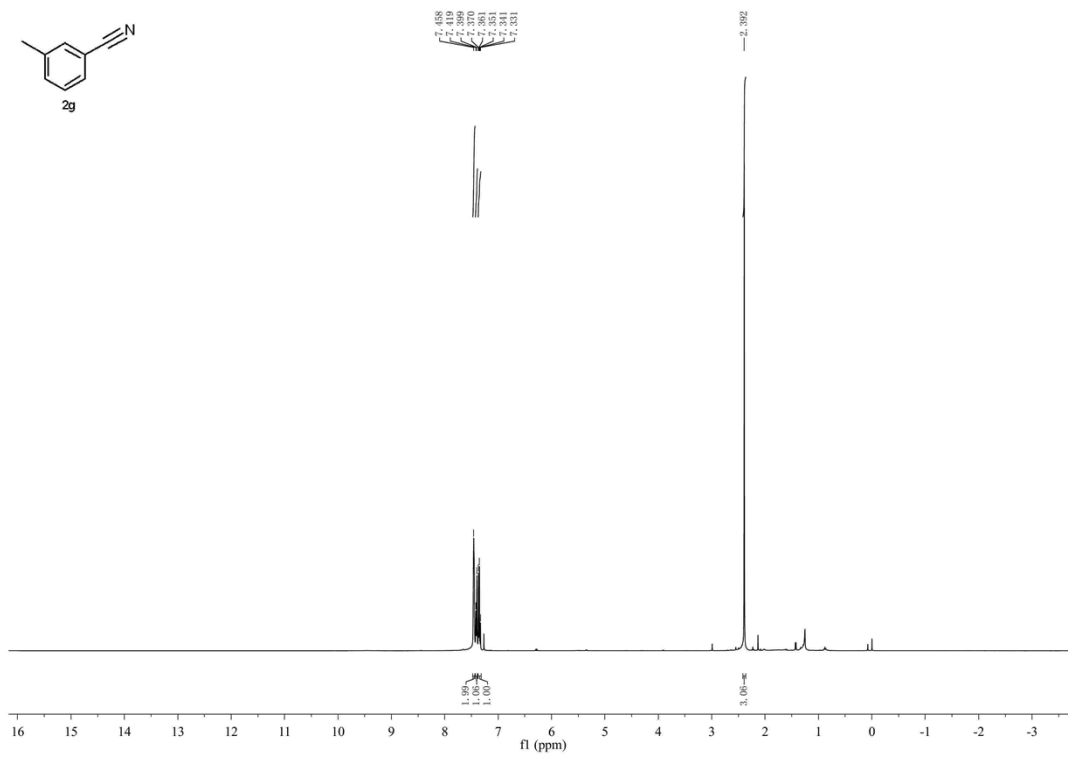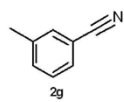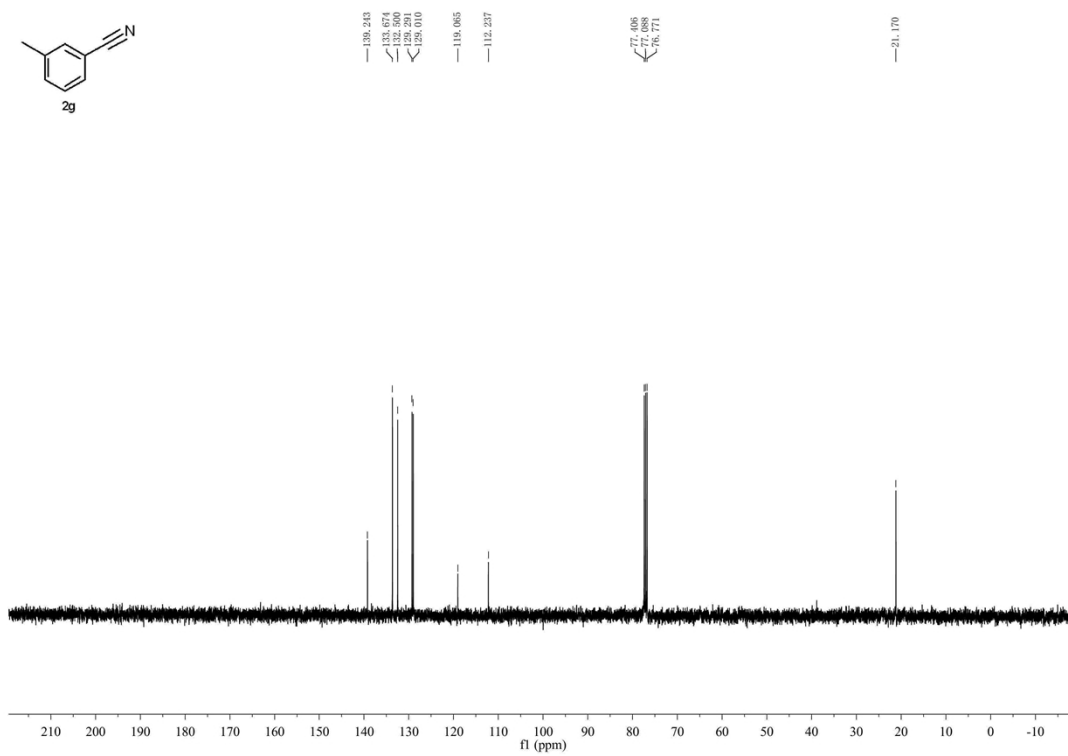

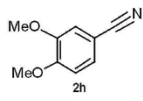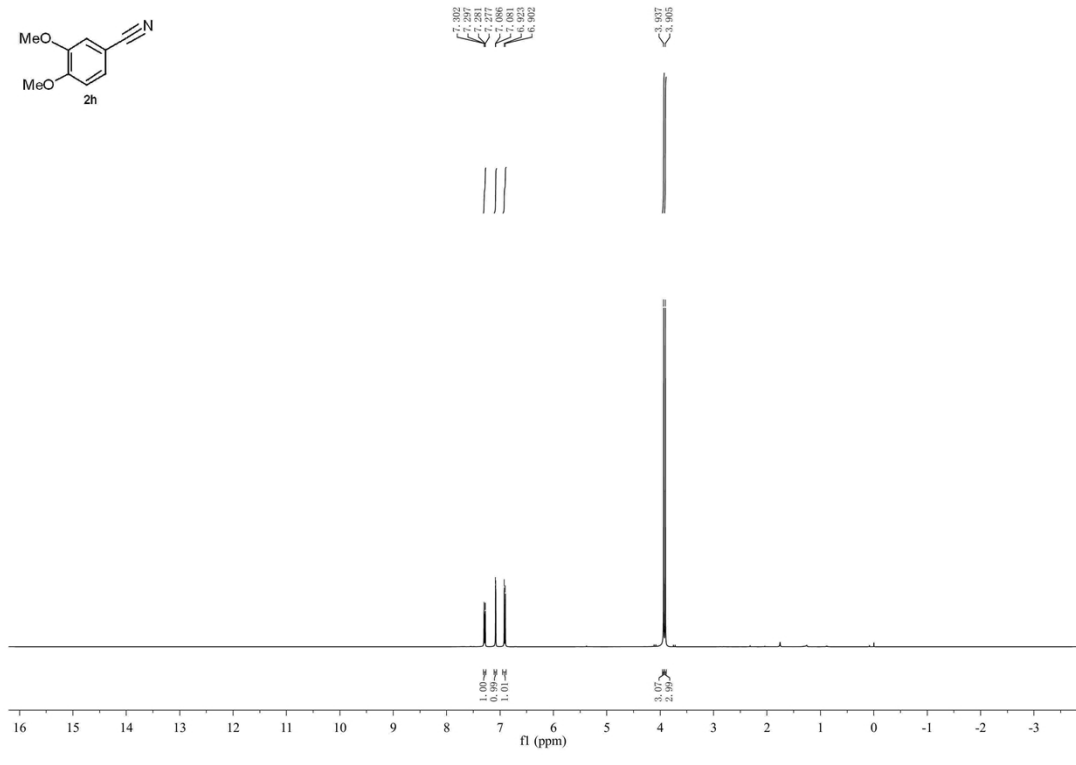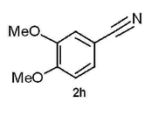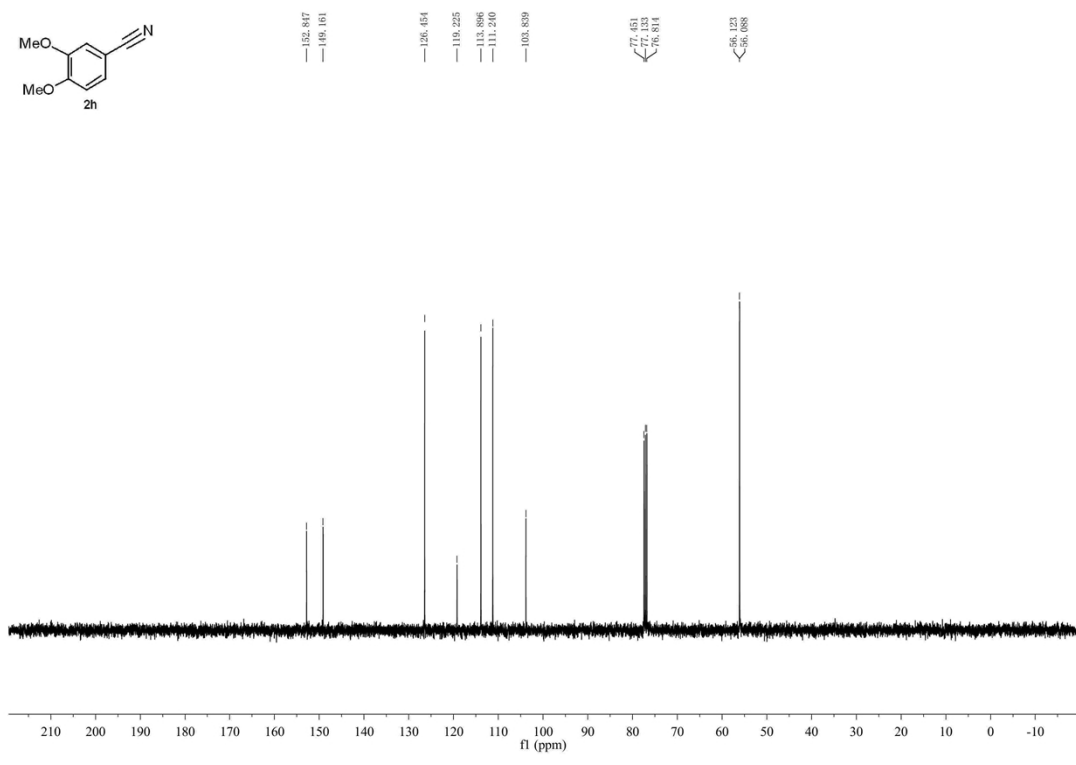

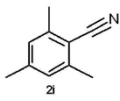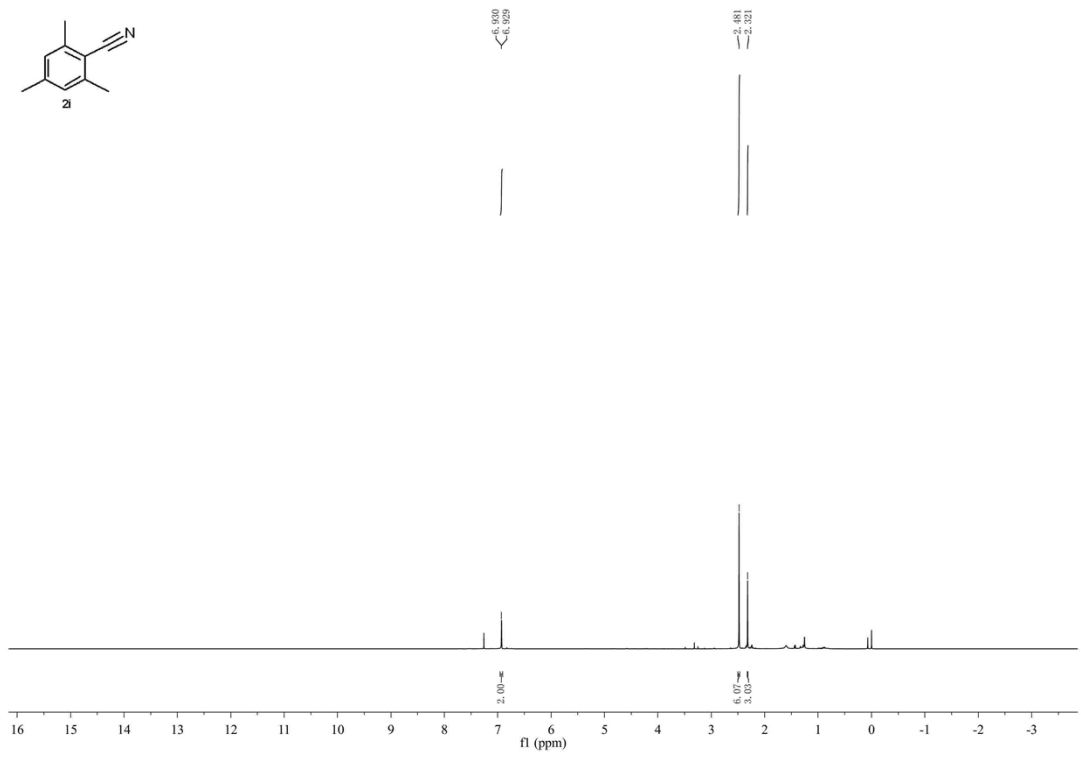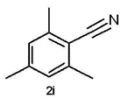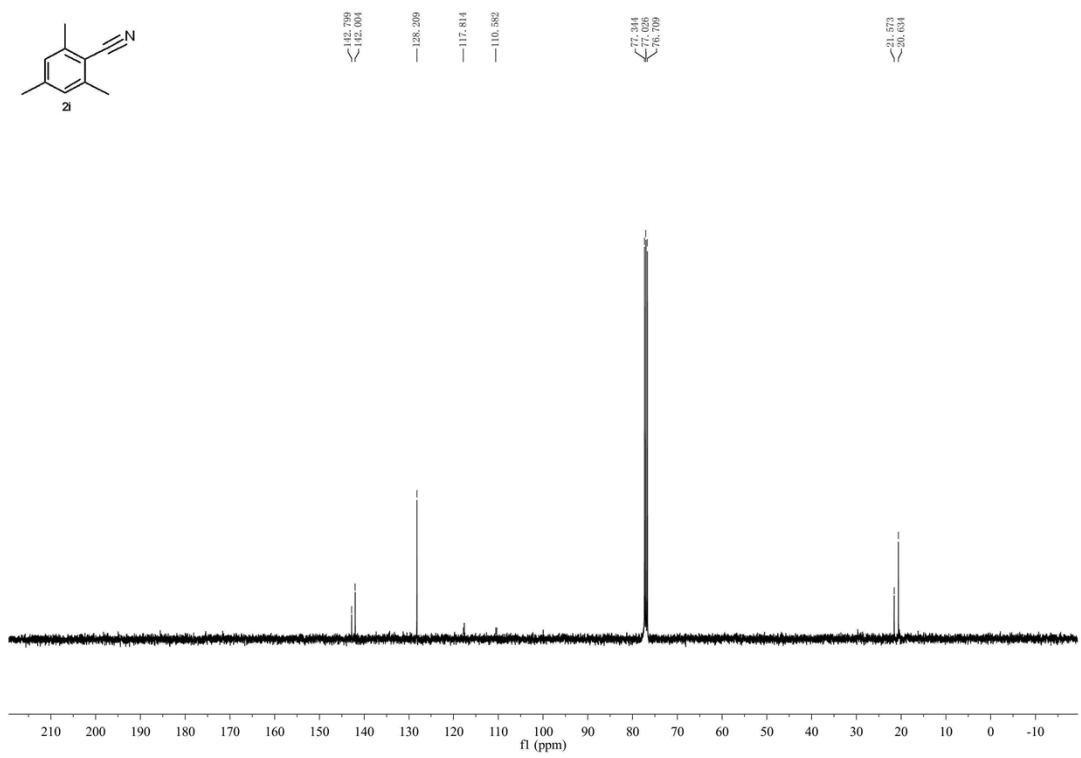

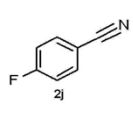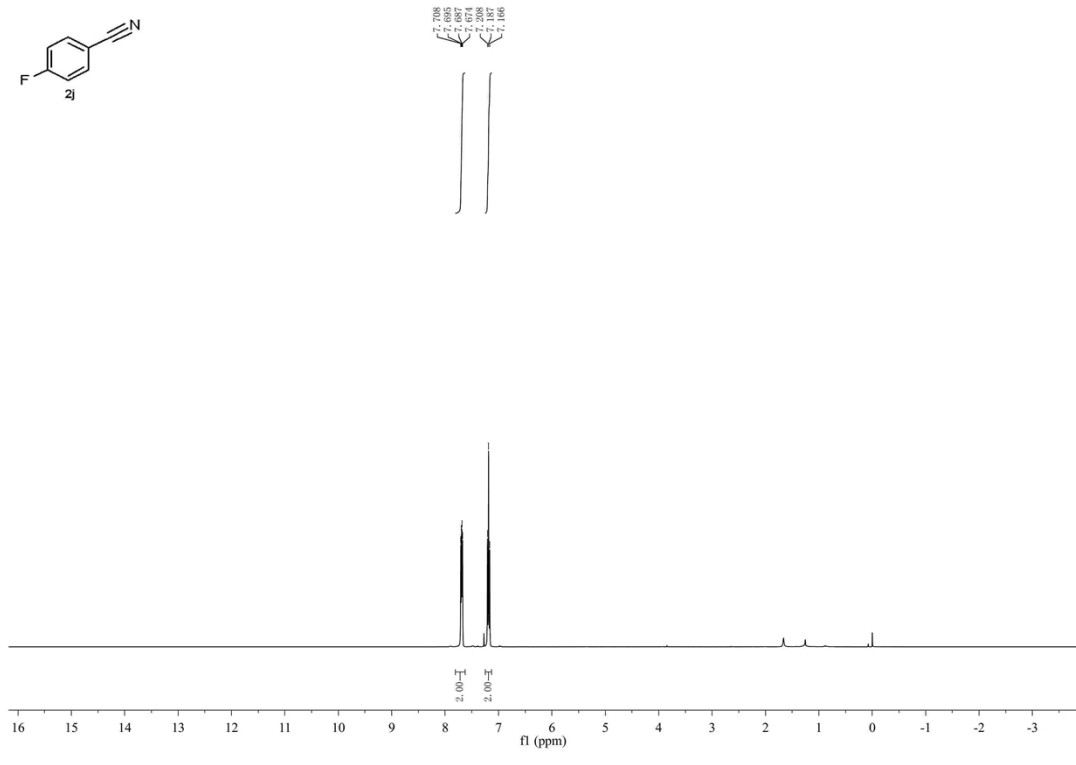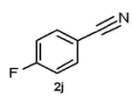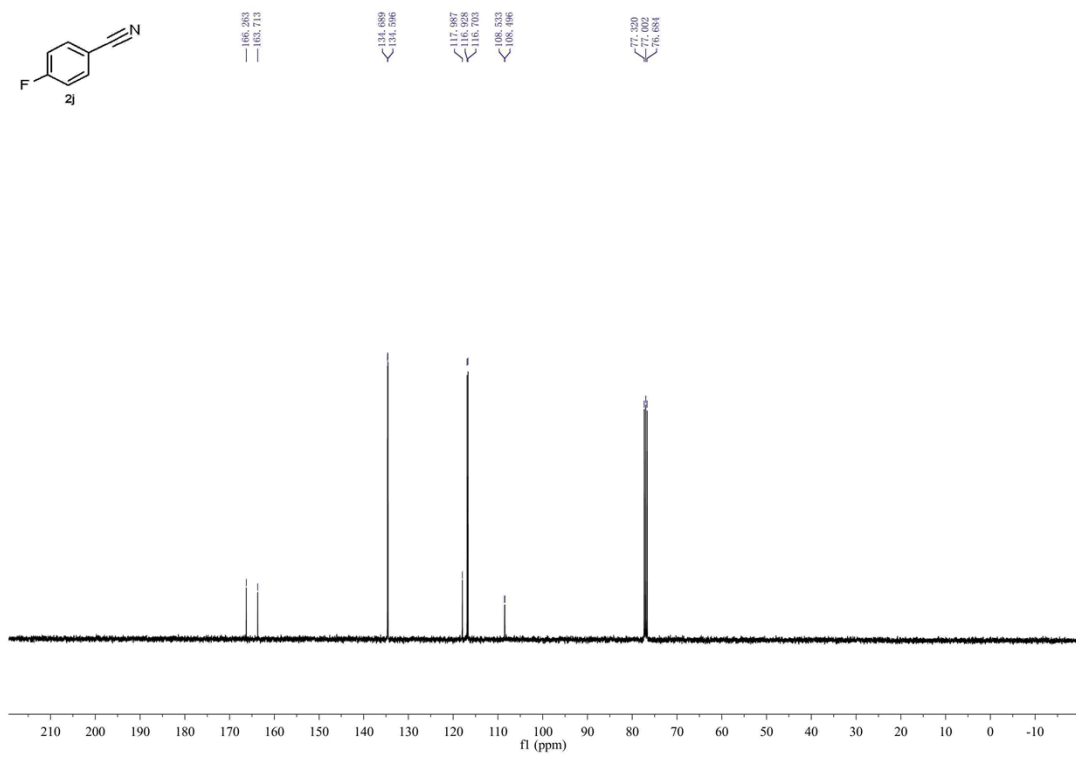

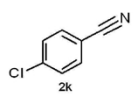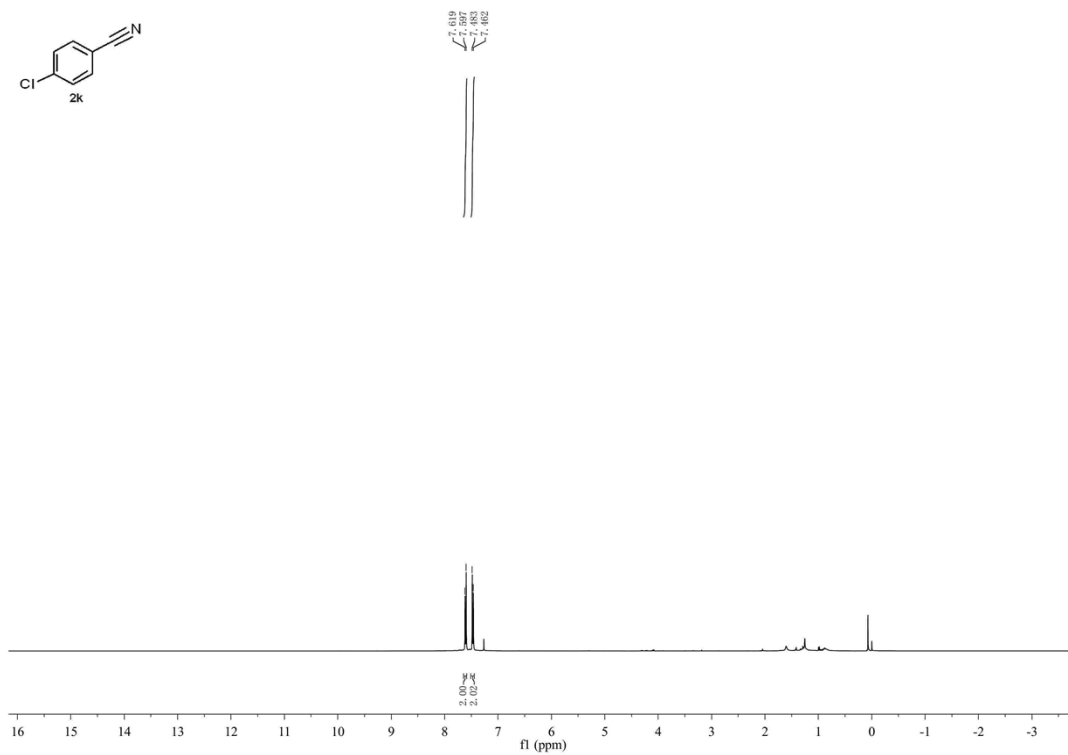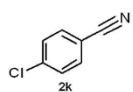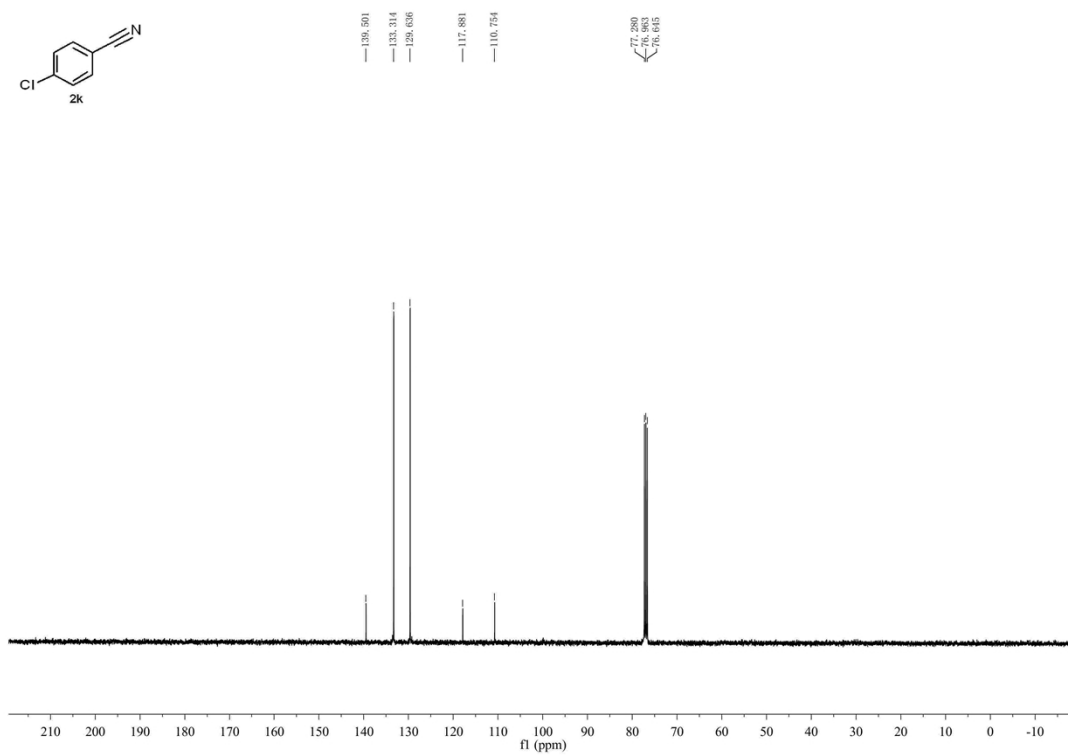

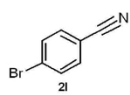

7.65  
7.62  
7.58  
7.54

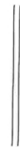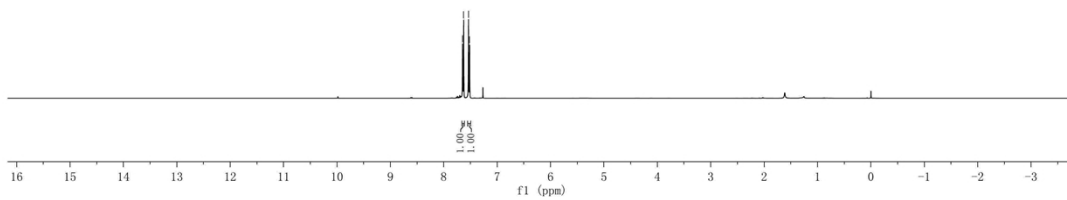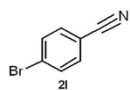

133.42  
132.66  
132.09  
118.07  
111.26

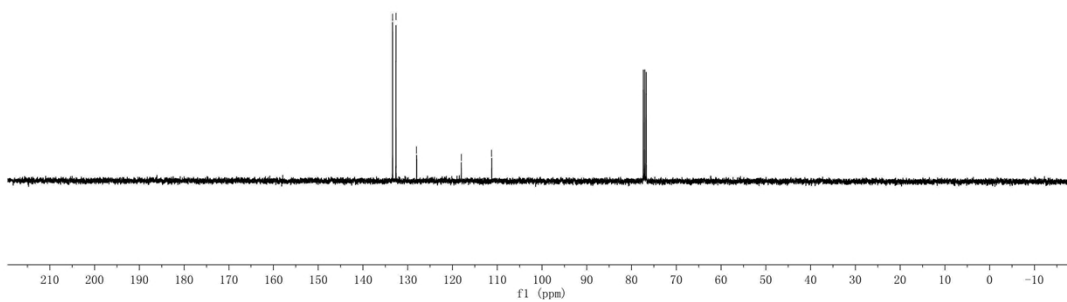

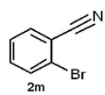

7.711  
7.707  
7.691  
7.688  
7.680  
7.666  
7.660  
7.493  
7.478  
7.469  
7.455  
7.447  
7.432  
7.413  
7.410

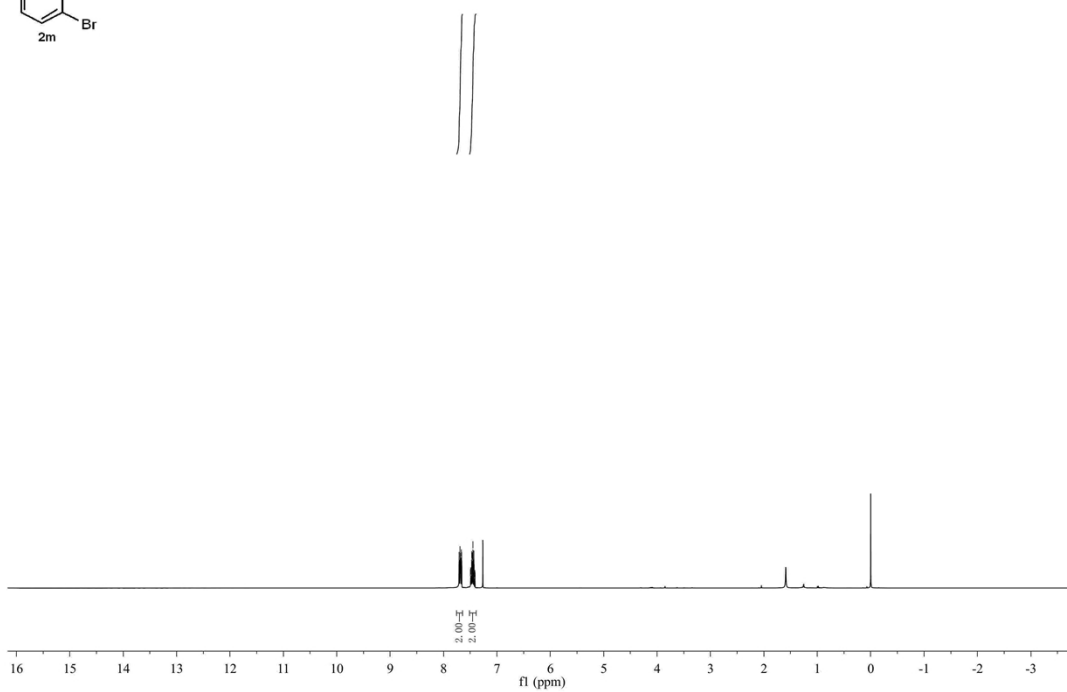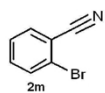

134.342  
133.887  
133.217  
132.357  
117.188  
115.911  
77.000  
77.005  
76.707

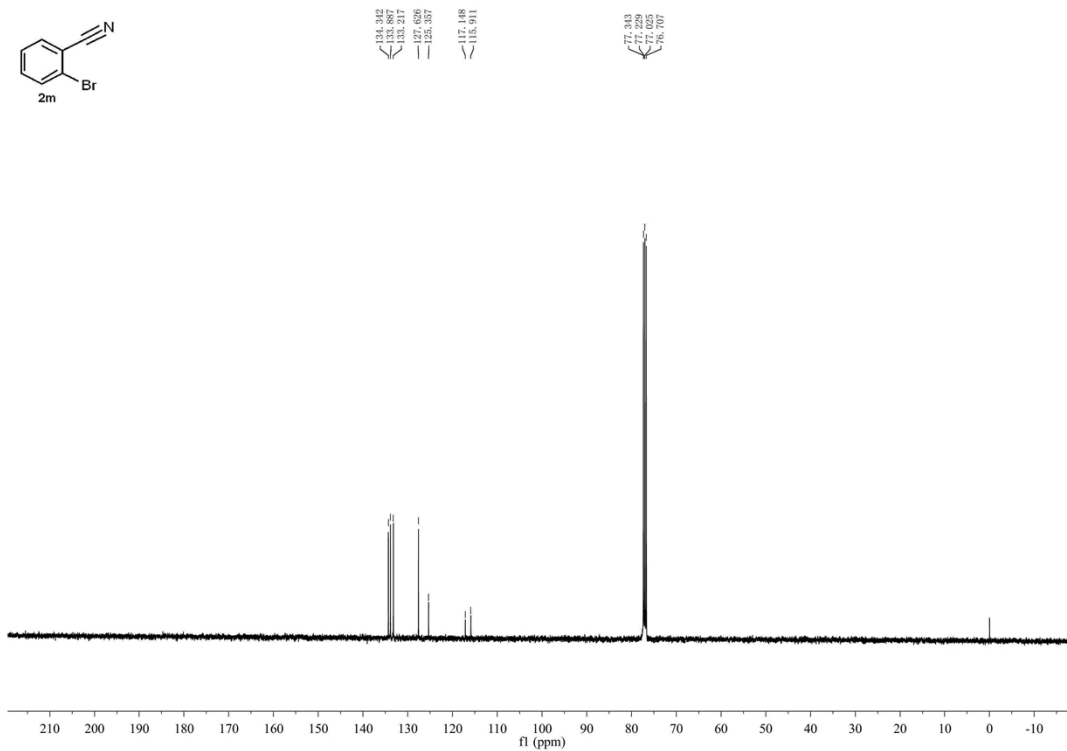

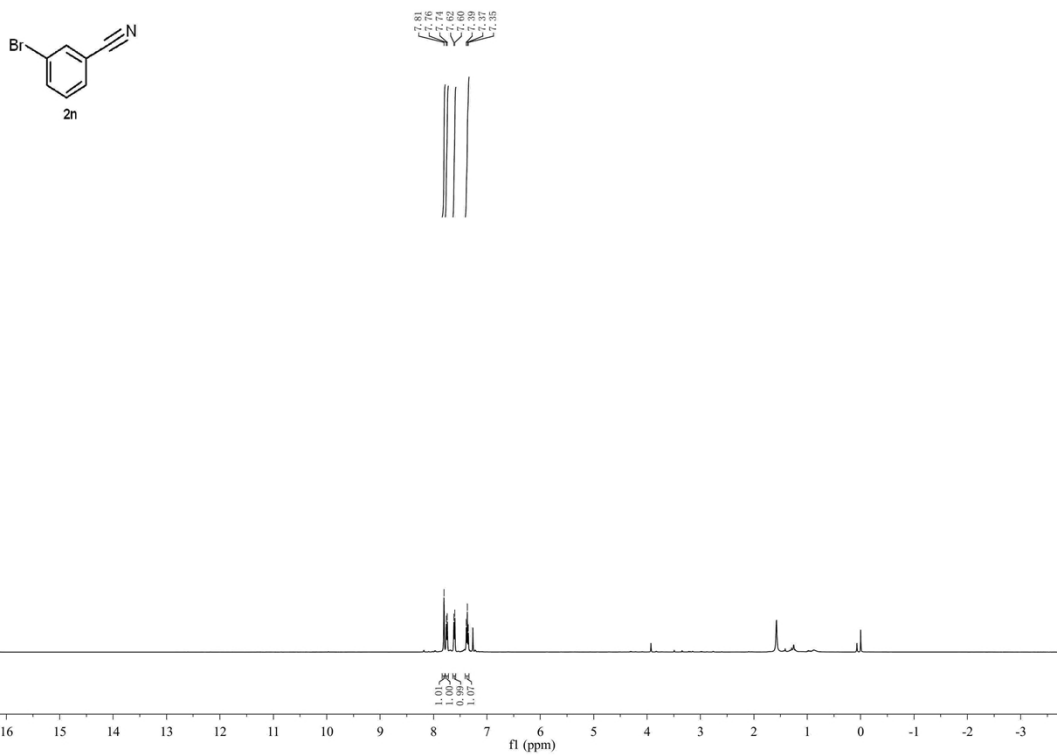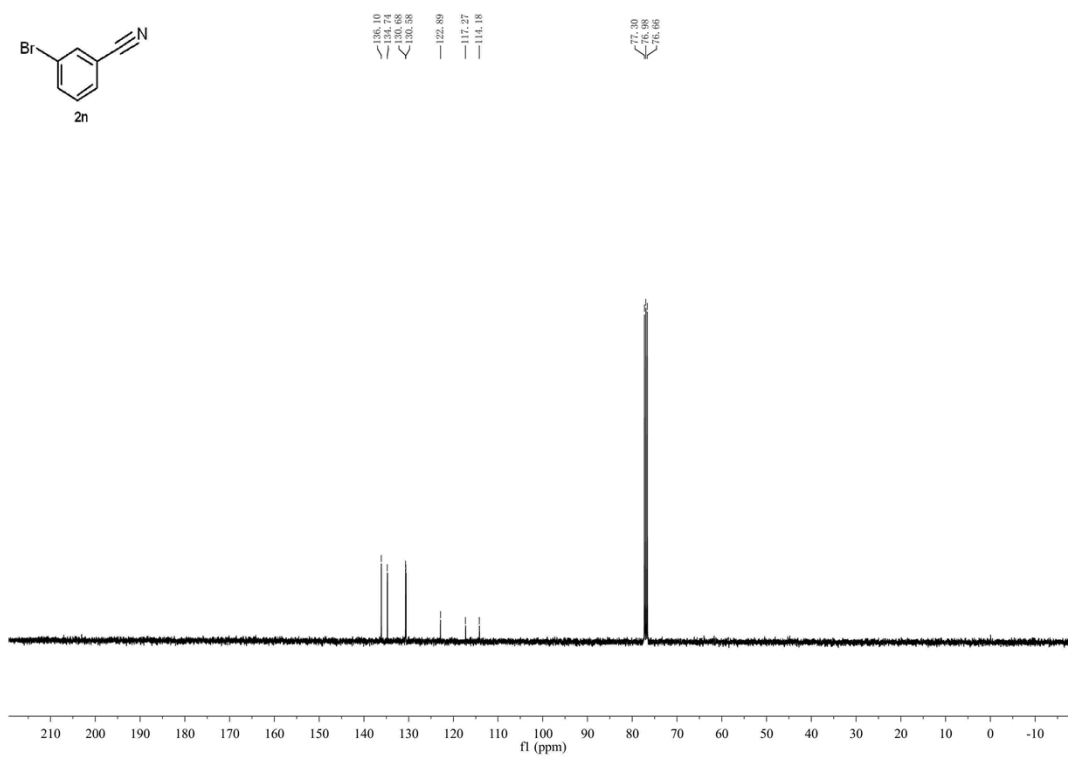



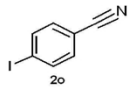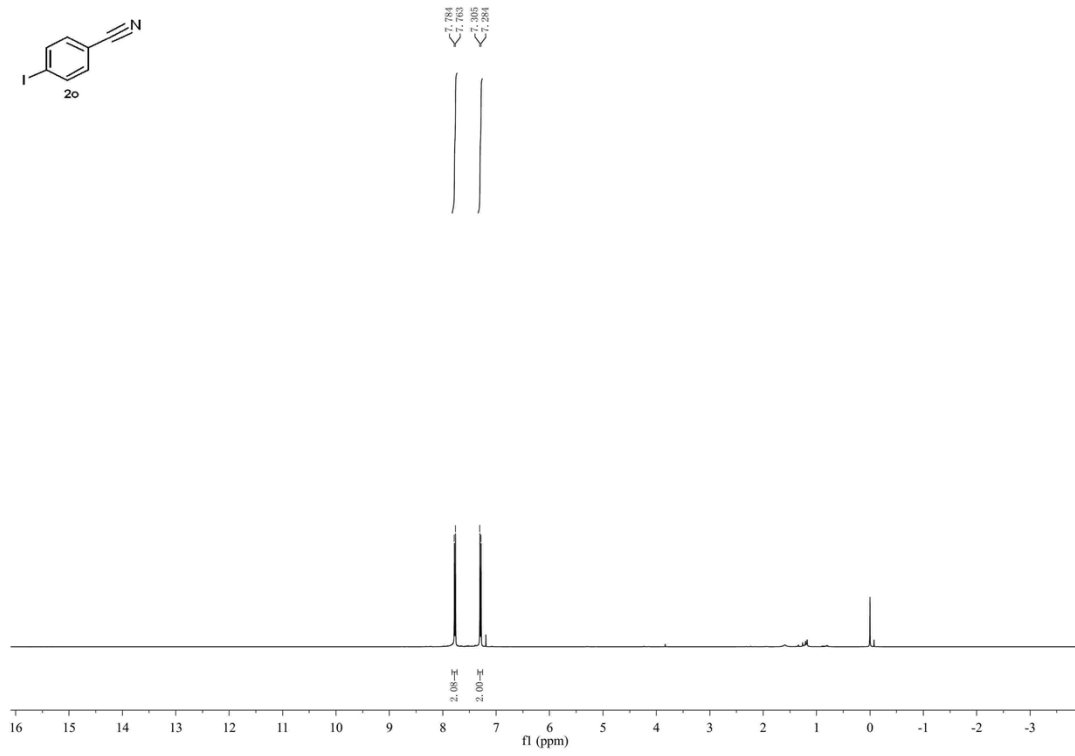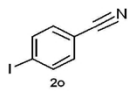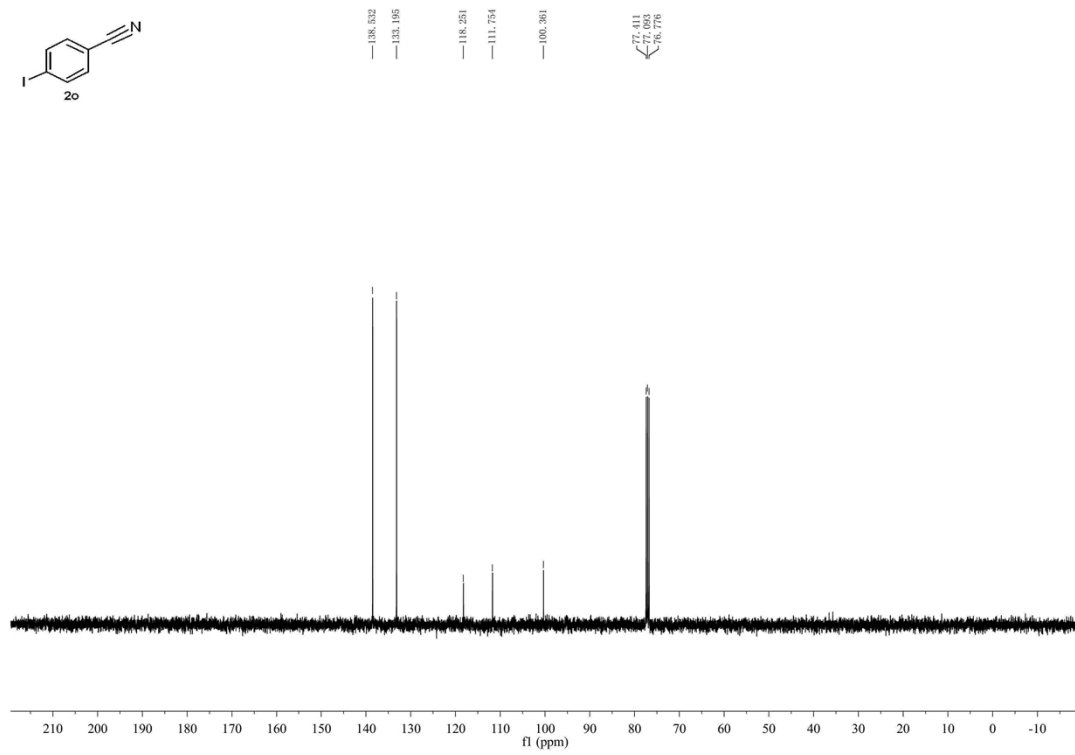

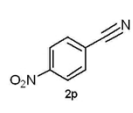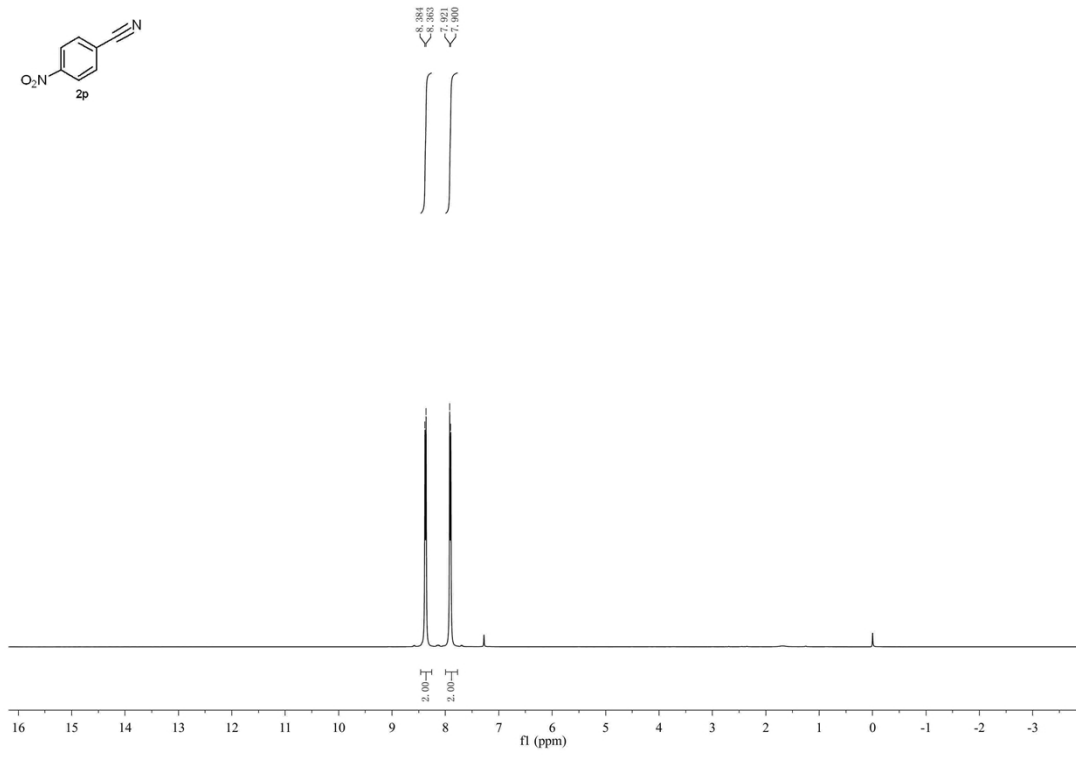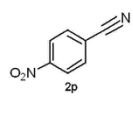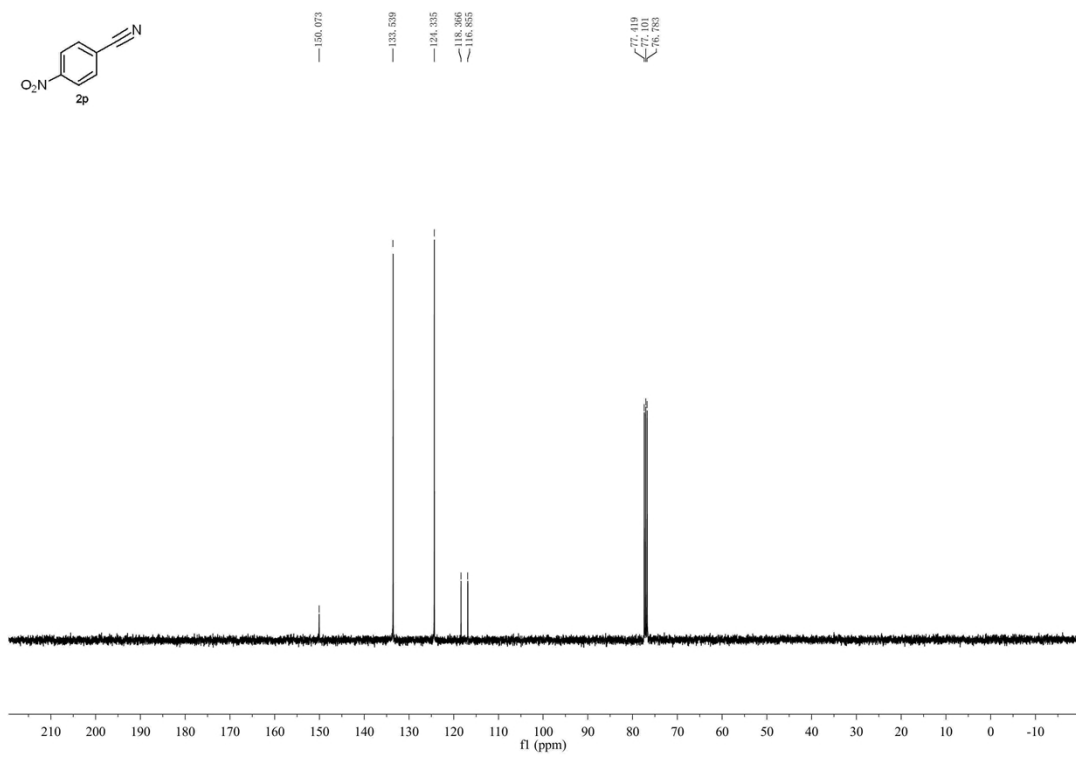

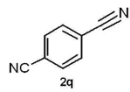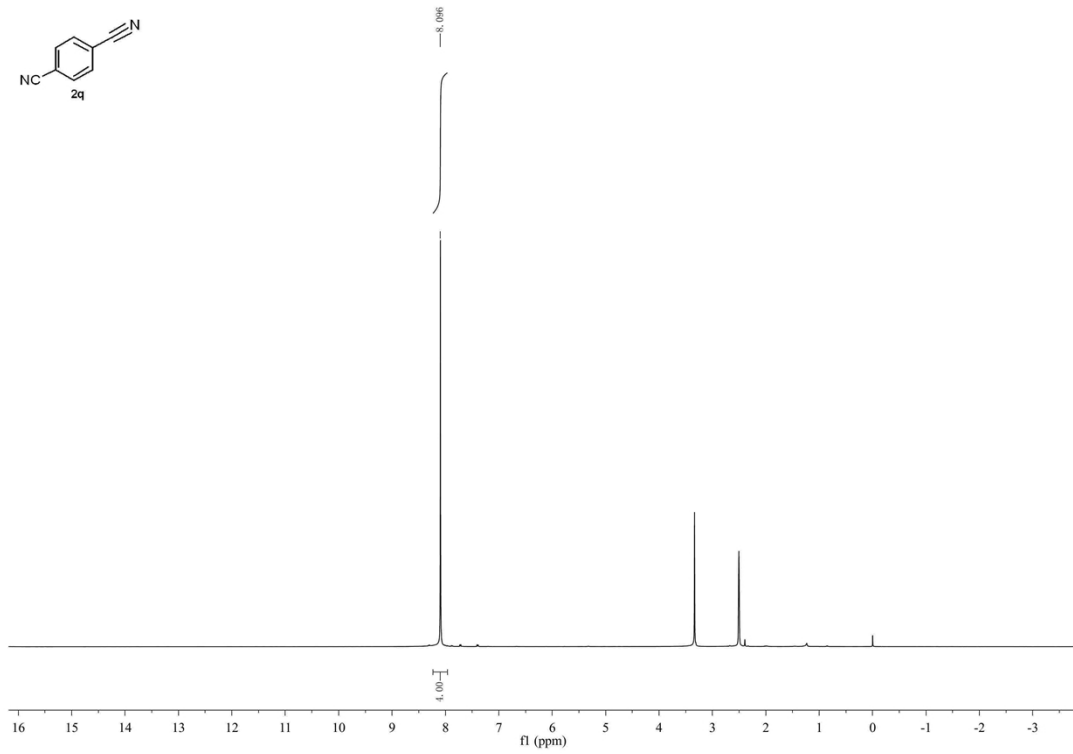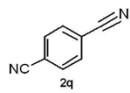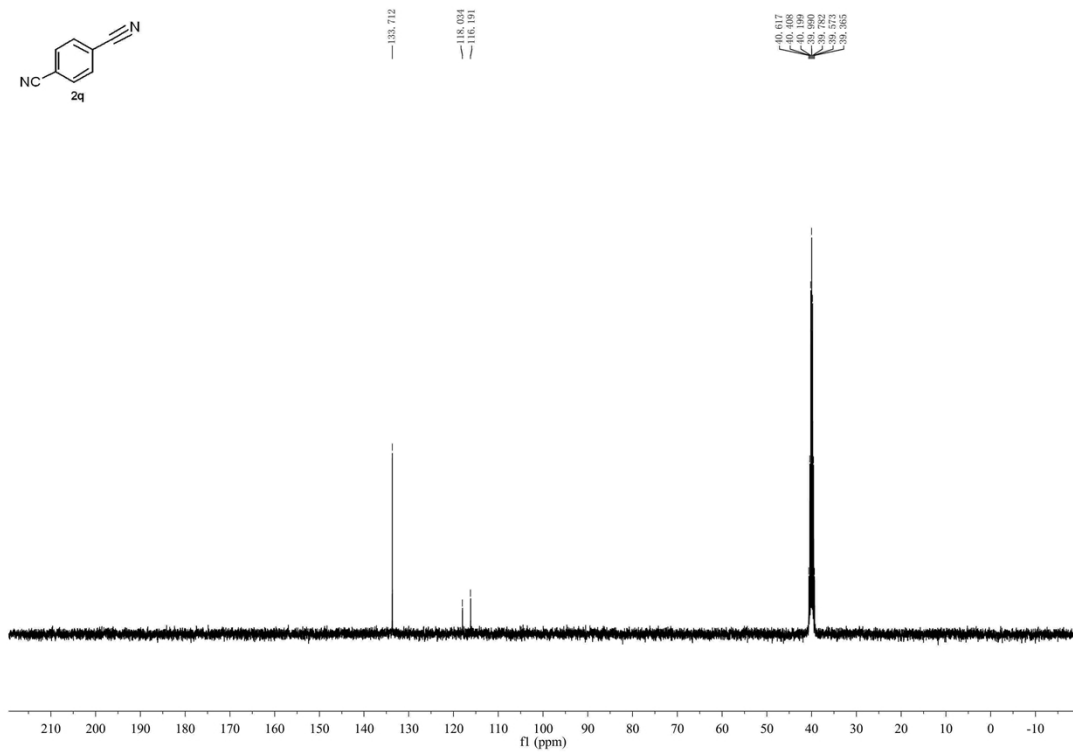

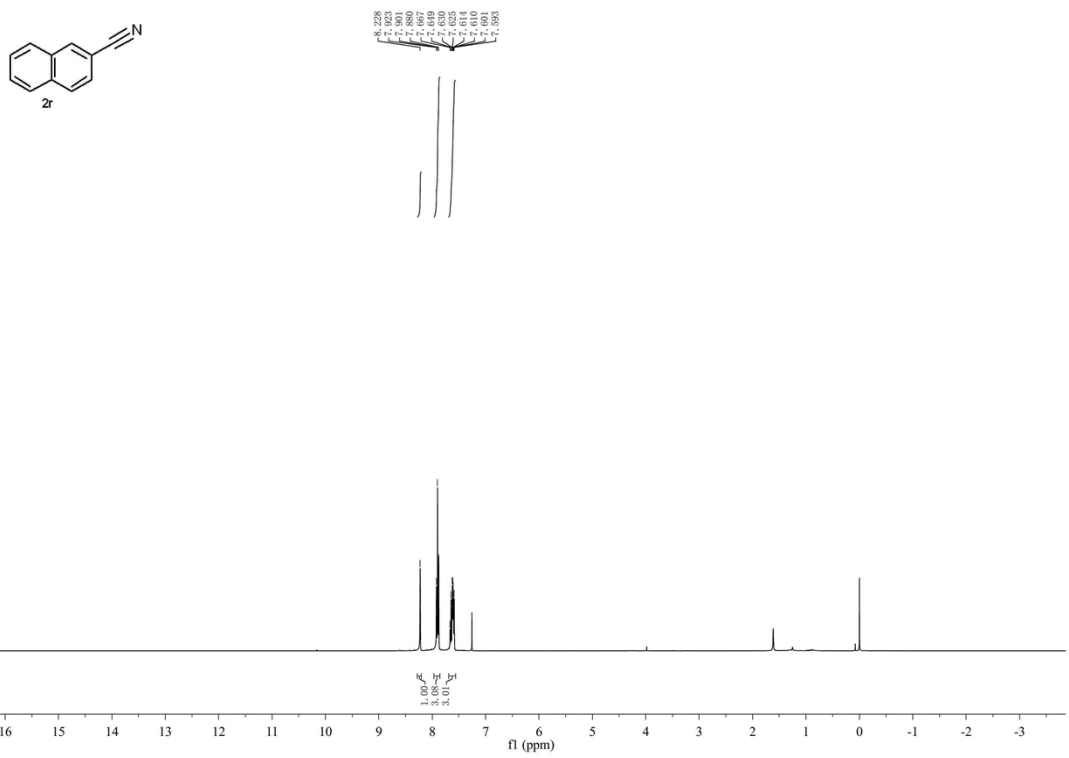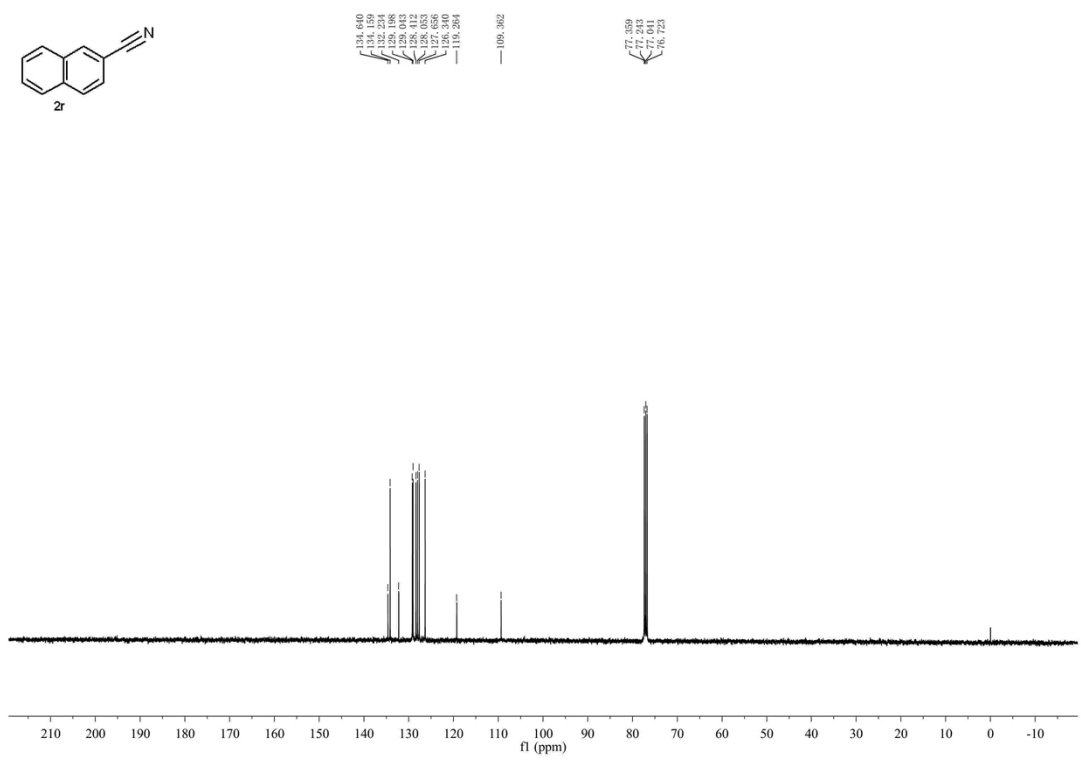

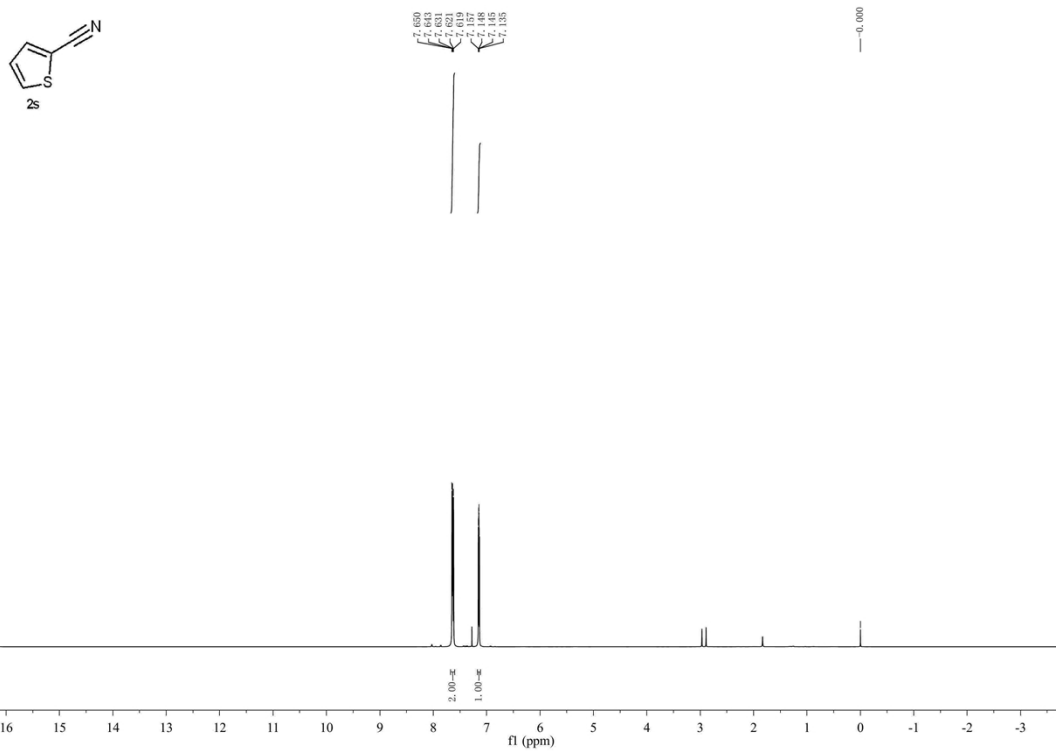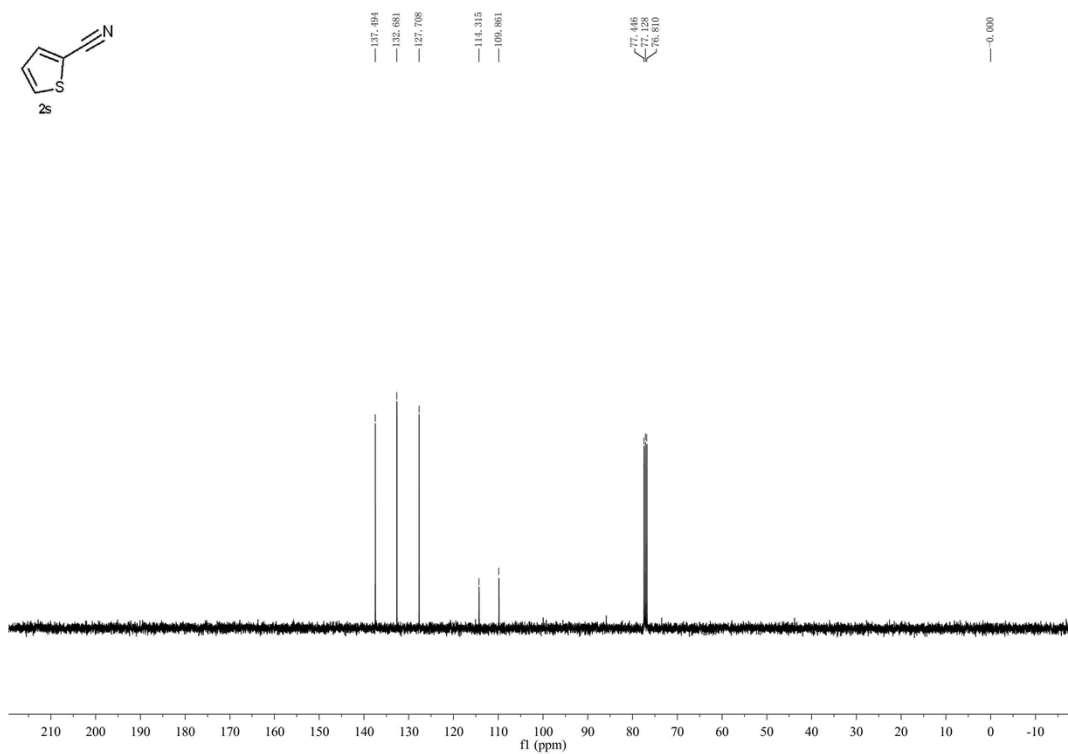

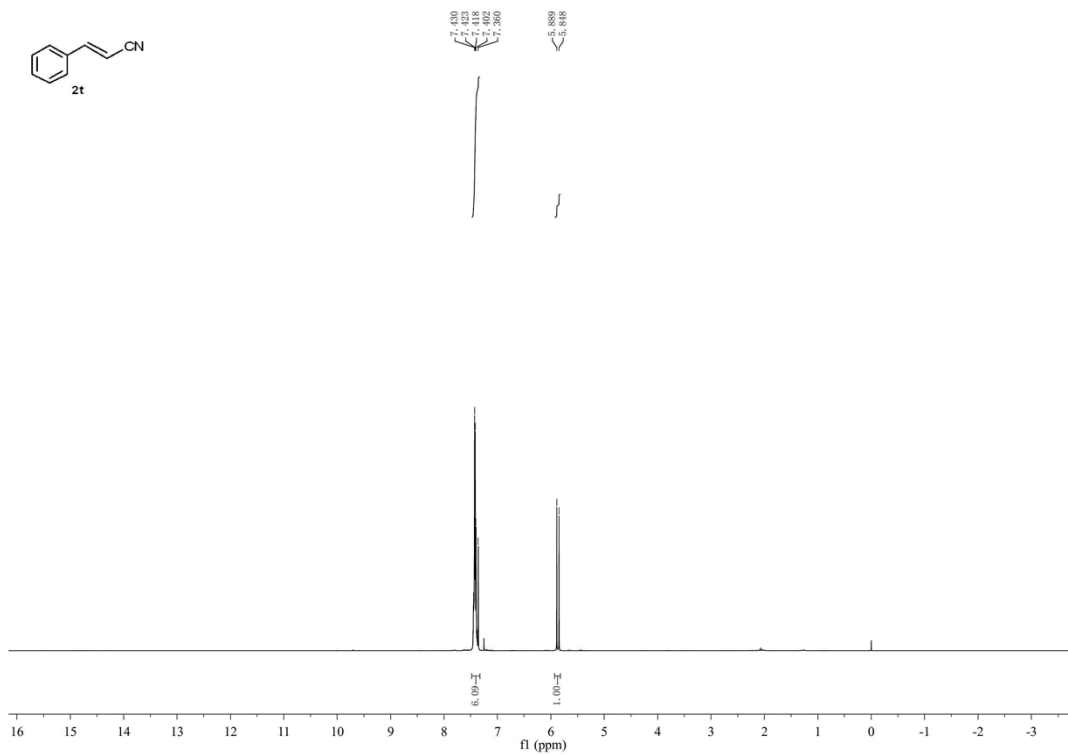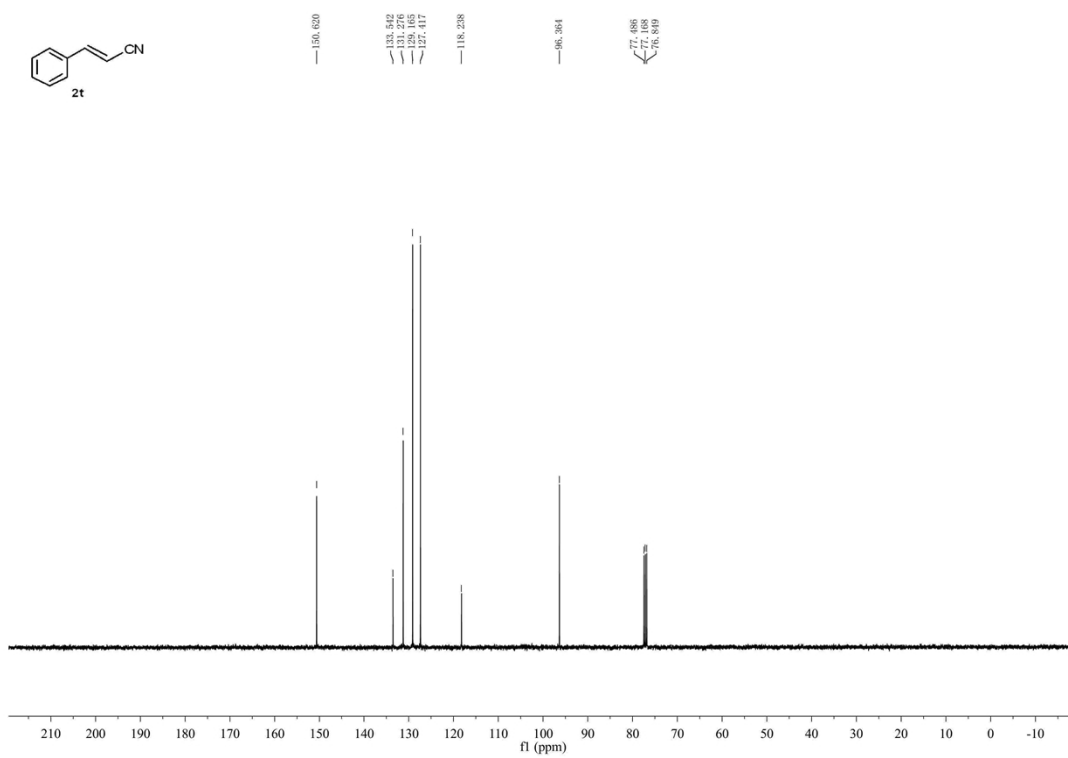

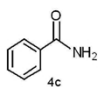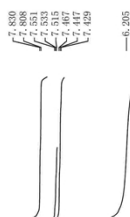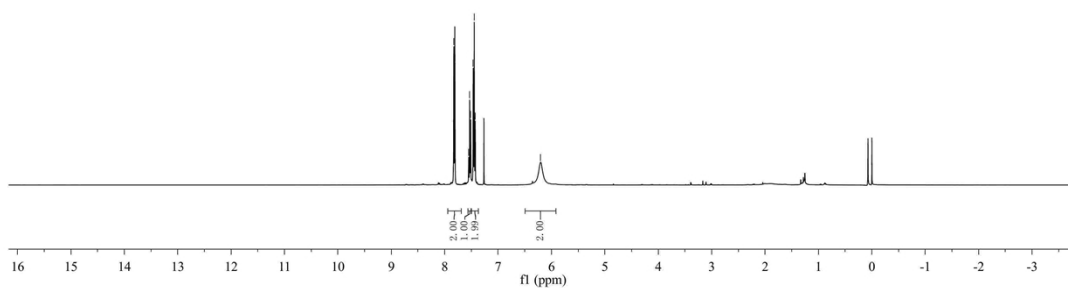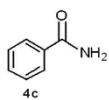

169.059

133.181  
128.649  
127.383

77.276  
77.008  
76.741

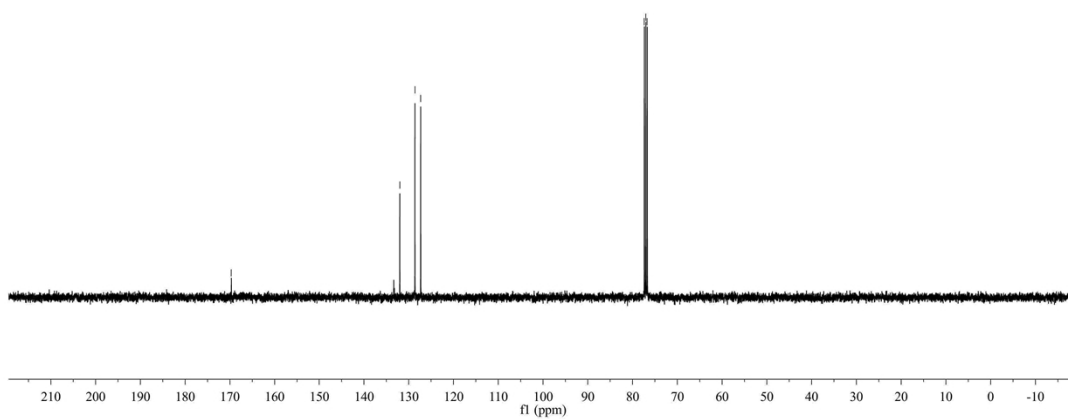

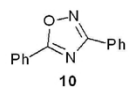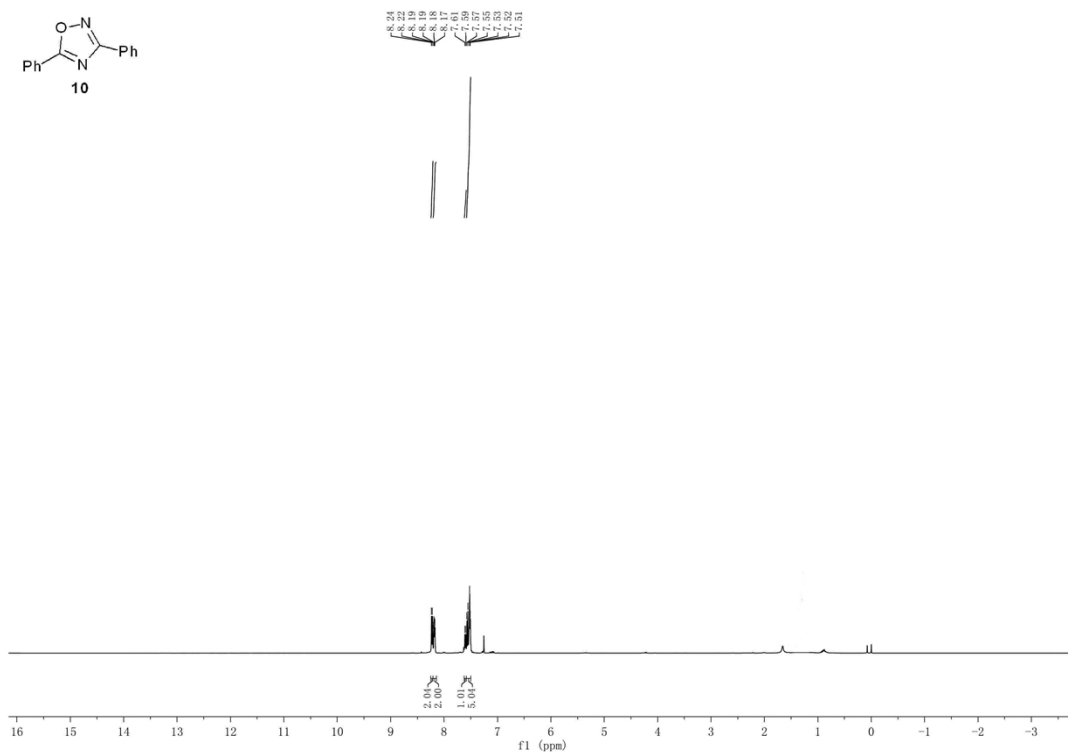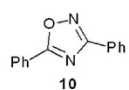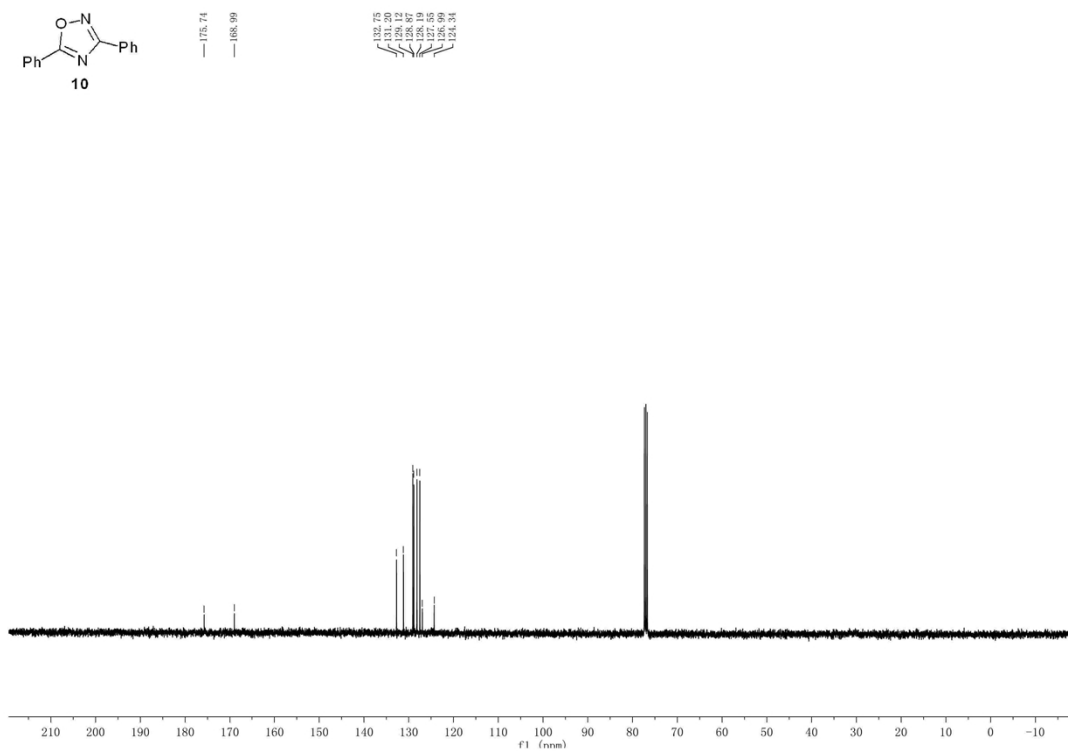

Supplement: c5cc02578h1.pdf [file c5cc02578h1.pdf]
